# Supplementary material for: Silver nanoflowers coupled with low dose antibiotics enable the highly effective eradication of drug-resistant bacteria
Source: Royal Society of Chemistry journal article supplement (doi:10.1039/d1tb01773j), 2021-01-01
Supplement: d1tb01773j1.csv [file d1tb01773j1.csv]

Name	R.T. (s)	Similarity	Quant Masses	QC_RSD(%)	20210126 B1-1_Result.csv	20210126 B1-2_Result.csv	20210126 B1-3_Result.csv	20210126 B1-4_Result.csv	20210126 B1-5_Result.csv	20210126 B2-1_Result.csv	20210126 B2-2_Result.csv	20210126 B2-3_Result.csv	20210126 B2-4_Result.csv	20210126 B2-5_Result.csv	20210126 B3-1_Result.csv	20210126 B3-2_Result.csv	20210126 B3-3_Result.csv	20210126 B3-4_Result.csv	20210126 B3-5_Result.csv	20210126 B4-1_Result.csv	20210126 B4-2_Result.csv	20210126 B4-3_Result.csv	20210126 B4-4_Result.csv	20210126 B4-5_Result.csv	20210126 QC2_Result.csv
N_N-Dimethylhexanamide	1445.44	323	XIC(100.07¡À500ppm)	Infinity	716890	252900	819840	414098	483403	420336	390926	426887	330260	334561	530403	412294	358160	496032	477350	293031	502806	331237	580498	422345	710383
glycine 1	320.114	752	XIC(102.07¡À500ppm)	Infinity	88183910	79526841	71747203	63625275	63982852	58881107	57022593	56092658	50873863	50357903	67442583	58208553	54715444	53256444	53917828	47310807	46929164	48740786	48395091	47087792	77141793
5_6-Dimethylbenzimidazole 2	1588.57	357	XIC(103.05¡À500ppm)	Infinity	593899	8740971	8543819	978012	1017002	320681	6156656	717142	4590721	605382	439910	331081	433105	2101024	745610	547465	561542	693813	625928	558156	718802
D-galacturonic acid 2	1536.62	272	XIC(105.00¡À500ppm)	Infinity	221792	140124	131828	90790	84609	118957	161160	78776	75309	104972	186022	163533	109977	108640	145351	124501	132456	124977	145430	78811	225643
carbamoyl-aspartic acid 2:2	1605.18	325	XIC(105.07¡À500ppm)	Infinity	718913	420743	435546	428833	249948	413637	310501	277992	287796	305684	333081	297162	339714	388887	411679	319214	382364	359553	340045	303179	703165
Pyridine_ 2-ethyl-5-methyl-	255.293	302	XIC(106.07¡À500ppm)	Infinity	6915921	6947110	7735706	6230676	6165841	6347686	6293304	7260538	6138356	5934645	8237791	7670753	7624794	7483082	8598026	7712041	7667147	7738336	7814988	7790425	8478809
Pyridine_ 2-ethyl-5-methyl-	255.293	302	XIC(106.07¡À500ppm)	Infinity	6915921	6947110	7735706	6230676	6165841	6347686	6293304	7260538	6138356	5934645	8237791	7670753	7624794	7483082	8598026	7712041	7667147	7738336	7814988	7790425	8478809
Pentacosane:2	1794.8	602	XIC(113.13¡À500ppm)	Infinity	663358	369190	353232	76434	144826	128857	242003	118487	122851	131484	232044	298635	104609	138284	94638	80420	41887	99599	159062	297903	783638
Pentacosane	1897.37	575	XIC(113.13¡À500ppm)	Infinity	614504	293551	321131	78286	164863	98688	239391	111014	101292	122174	156913	208573	49058	72620	85815	98554	60517	115621	105771	298054	649290
2-Acetoxyindane	595.442	496	XIC(116.06¡À500ppm)	Infinity	577637	474091	550624	424634	382424	448823	390270	371973	358450	387887	495262	517677	512994	497650	489045	462968	445726	432792	502753	489751	720694
Alanine_ N-methyl-N-(2-methoxyethoxycarbonyl)-_ propyl ester	237.553	291	XIC(116.09¡À500ppm)	Infinity	320071	380247	364489	314161	287939	352712	327277	327044	361957	290495	429320	431449	454218	398580	386808	421583	399020	471052	407256	483608	454687
Alanine_ N-methyl-N-(2-methoxyethoxycarbonyl)-_ propyl ester	237.553	291	XIC(116.09¡À500ppm)	Infinity	456340	380247	364489	314161	287939	352712	327277	327044	361957	290495	429320	431449	454218	398580	386808	421583	399020	471052	407256	483608	454687
alanine 1	304.307	610	XIC(116.09¡À500ppm)	Infinity	16452564	16257749	16906532	14426289	15069432	11856733	10423604	13635448	7585766	9153937	21760305	11451308	13330993	12333747	21502303	19290086	11993120	14381118	14610634	15685531	16722834
Alanine_ N-methyl-N-methoxycarbonyl-_ undecyl ester	334.072	494	XIC(116.09¡À500ppm)	Infinity	14563609	12050241	10644831	9057076	8871765	8430073	7831547	7541912	6979822	6500464	11649360	8850967	7911364	7478453	7544437	6336727	5626497	5972242	6053498	5530980	13713965
D-alanyl-D-alanine 2	334.072	494	XIC(116.09¡À500ppm)	Infinity	14563609	12050241	10644831	9057076	8871765	8430073	7831547	7541912	6979822	6500464	11649360	8850967	7911364	7478453	7544437	6336727	5626497	5972242	6053498	5530980	13713965
Propylene glycol_ 2TMS derivative:2:2	229.101	559	XIC(117.04¡À500ppm)	Infinity	2962682	3144960	2468776	2427330	2924594	2604785	2617772	2388801	2520269	2505894	3979531	3353951	3443937	3544755	3938471	3813361	4251340	3690547	4571045	3741688	4284158
Propylene glycol_ 2TMS derivative:2:2	229.101	559	XIC(117.04¡À500ppm)	Infinity	2962682	3144960	2468776	2427330	2924594	2604785	2617772	2388801	2520269	2505894	3979531	3353951	3443937	3544755	3938471	3813361	4251340	3690547	4571045	3741688	4284158
lauric acid	820.791	713	XIC(117.04¡À500ppm)	Infinity	7870427	7005027	6030937	5419264	5085984	5334642	4021837	5383521	3899706	3467797	6721623	5309889	5701133	5221060	5283815	4963419	4693672	4900066	6795589	5532850	8412457
Acetoin_ TMS derivative	1116.1	262	XIC(117.04¡À500ppm)	Infinity	30053	63954	222693	242183	234647	236862	40520	199907	172748	80943	318720	328442	11786	62182	165972	193318	170482	225325	184152	167357	776846
2-Hydroxyisocaproic acid_ TMS derivative	345.536	296	XIC(117.06¡À500ppm)	Infinity	656675	2374743	2042037	2375100	2228105	438070	2309763	363428	3056706	2576763	439894	2565907	2837552	2591871	3588280	3109391	3104212	3104056	871499	3307132	817959
Carnitine:2	430.11	431	XIC(117.07¡À500ppm)	Infinity	7142594	7095670	6809698	6980626	6589511	6601794	6654959	6626725	6663952	6451990	9167324	8257720	8502316	8142880	7706168	8252726	8379016	8552182	8307491	8457802	8880546
Carnitine	430.11	431	XIC(117.07¡À500ppm)	Infinity	7142594	7095670	6809698	6980626	6589511	6601794	6654959	6626725	6663952	6451990	9167324	8257720	8502316	8142880	7706168	8252726	8379016	8552182	8307491	8457802	8880546
5H-1-Pyrindine_ 6_7-dihydro-	260.492	273	XIC(118.07¡À500ppm)	Infinity	425551	389519	414671	404438	334928	369538	381429	410802	397825	402150	501921	502309	441439	459863	477325	508855	476743	470301	493528	504938	515742
Pyridine_ 2_4_6-trimethyl-	230.807	361	XIC(121.09¡À500ppm)	Infinity	95054732	87451063	86909511	79165930	80663151	84333796	84081083	82583947	80973977	79226511	108417023	106412201	106062817	107059763	105175673	108660184	105457882	110877005	111670712	111503076	123190936
2-Furoic Acid	333.382	895	XIC(125.05¡À500ppm)	Infinity	15585174	7426289	4975523	3815139	3320727	3011141	2611682	2333550	2270690	1976064	4740510	3053997	2347742	2021961	1965161	1802447	1585967	1572982	1626370	1654495	14309606
4-Fluoro-2-methoxyphenol	266.821	361	XIC(127.07¡À500ppm)	Infinity	2934111	2878230	2864099	2638445	2426411	2628636	2749934	2387164	2692341	2356684	3398250	3283345	3685630	3486297	3177348	3111845	3004145	3239111	3114583	3407604	3484973
2-Methoxy-4_4_5-trimethyloxazoline	456.479	183	XIC(128.06¡À500ppm)	Infinity	2743956	2061145	6169886	894129	813580	536010	522509	757770	705851	4382745	1035573	651249	767706	882266	855867	5597614	5685139	1334777	873757	647384	6538783
5-Norbornene-2-carboxylic acid_ tert.-butyldimethylsilyl ester (endo isomer)	216.329	403	XIC(129.08¡À500ppm)	Infinity	55493669	52385404	50127392	50681863	50082430	49805665	50078112	51182561	48797014	49058026	63656294	63244299	60776619	59759217	56722918	58605198	62652512	64669820	66120521	64056938	69430725
Adipic acid_ 3-heptyl propyl ester	835.622	474	XIC(129.08¡À500ppm)	Infinity	776451	553766	361177	376765	327449	235581	305717	390762	621051	554277	517136	435259	271861	323673	237891	273639	245809	285478	235845	399382	739075
Monoolein	1735.31	347	XIC(129.08¡À500ppm)	Infinity	862878	686769	694051	2479471	448242	2072973	410515	439852	1669371	353469	2422846	1954285	1730793	1637177	1578779	385420	1291586	1175180	1244008	324495	576810
Indolelactate 1	338.496	404	XIC(130.07¡À500ppm)	Infinity	3050801	2750308	2790264	3132729	2688749	2809703	3067287	2498696	2920296	3077317	4111538	3631736	3812164	3616029	3475971	3452896	3508731	3777650	3842069	3827005	3902312
Propylamine_ bis(2-methoxyethyl)-	386.662	468	XIC(130.11¡À500ppm)	Infinity	7795426	9567141	9351860	9049592	8347265	9217795	9454166	8548672	9160760	8677766	11023177	10328300	13933923	10100498	9265896	10171681	8877407	10765065	10546641	10446611	8906799
Phentermine_ N-trimethylsilyl-	436.615	312	XIC(130.11¡À500ppm)	Infinity	963044	1047019	1104518	1050756	884878	954962	1010235	922356	1100857	916179	1166236	1065906	1507632	1265227	1098758	981564	938158	963271	1017355	1049186	1088787
N-Methyl-DL-alanine	436.615	312	XIC(130.11¡À500ppm)	Infinity	963044	1047019	1104518	1050756	884878	954962	1010235	922356	1100857	916179	1166236	1065906	1507632	1265227	1098758	981564	938158	963271	1017355	1049186	1088787
N-Acetyltryptophan 4	445.022	468	XIC(130.11¡À500ppm)	Infinity	26463724	28056338	30646356	28541586	25247998	28575264	29373241	25992401	28963057	26912680	33490758	30998086	39843190	37069959	32837972	28793530	28459252	28828080	30777704	30060349	31169839
tert-Butylamine_ TMS derivative	452.966	479	XIC(130.11¡À500ppm)	Infinity	34910355	36592729	40054992	37046295	33122622	36888339	37012230	33317712	36258582	34397837	43439713	38895115	49255451	46222290	41897314	36067208	36072520	36310648	38918160	37682655	41722225
adenosine	1685.47	798	XIC(131.03¡À500ppm)	Infinity	547349	305155	287522	250415	280187	149847	132341	242467	137140	124944	314523	86584	162674	163149	327601	243985	162352	229608	234740	211477	241447
2-hydroxybutanoic acid	323.212	515	XIC(131.09¡À500ppm)	Infinity	3555496	2970653	2526841	2026445	1972167	1799143	1365506	1738374	1135858	1030131	2606895	2176378	1974255	1735883	2020873	1571222	1216212	1520799	1540432	1180636	3590959
1_2-Butanediol_ 2TMS derivative	381.77	352	XIC(131.09¡À500ppm)	Infinity	2714355	249088	37020	232058	50762	1098518	189210	905900	303365	186691	235357	1234518	1431672	203722	63987	229792	328944	429241	1161869	229142	11183285
Behenic acid;3	1310.75	368	XIC(132.00¡À500ppm)	Infinity	238201	134643	126089	82231	72782	29098	69763	62239	66947	40975	116987	68927	81497	84729	76966	44173	51402	48854	56868	58512	155214
5-Methoxytryptamine 2:2	608.505	638	XIC(132.12¡À500ppm)	Infinity	367221	465956	393763	415539	359154	358603	290405	357521	270818	285331	313007	301217	331957	280599	247862	253137	266576	246723	291652	326804	326392
4-Ethyl-3_5-dimethyl-1H-pyrrole-2-carboxaldehyde	250.93	418	XIC(136.06¡À500ppm)	Infinity	8460554	9066452	11743338	8292635	9573012	8752583	8255512	8023732	7564528	7944677	12074984	11937730	12559601	13970089	13199364	12775796	12730963	12226969	13835645	13797300	11118985
L-Proline_ N-(cyclopropylcarbonyl)-_ propyl ester	321.211	259	XIC(138.01¡À500ppm)	Infinity	467366	1616505	1484247	364571	1568600	267158	1401017	1543521	1398006	256571	2284222	51810597	268841	1464044	956581	305612	1540526	1548639	244224	334077	570270
3-Methyl-2-furoic acid_ TMS derivative	429.284	334	XIC(139.06¡À500ppm)	Infinity	1363507	739339	441801	346032	297911	257084	259830	241398	243484	241402	650392	385832	297252	254492	275848	253899	228258	186958	208459	188501	1354898
Oxalic acid_ di(1-menthyl) ester	1380.87	271	XIC(139.15¡À500ppm)	Infinity	92182	50753	66279	30240	20583	14117	98247	5166	59931	64587	44057	127146	28039	39720	42981	45744	24030	19215	55515	127146	348235
2-Pyrazoline-1-carboxamide_ 3_5-dimethyl-	285.719	266	XIC(141.09¡À500ppm)	Infinity	944314	963016	919910	963276	935528	886533	931397	944717	892795	905566	1192183	1150218	1203581	1169181	1121821	1092650	1147870	1238472	1203865	1160667	1167368
3-Cyanoalanine	517.155	369	XIC(141.11¡À500ppm)	Infinity	798768	475281	560090	413338	482454	479297	552202	485014	548842	383110	624830	948109	355472	475902	494298	596802	66669	569971	571850	652548	794303
N-alpha-Acetyl-L-ornithine 2	377.69	480	XIC(142.00¡À500ppm)	Infinity	13893	18624	17033	23472	28741	16504	17229	24765	8542	13142	43919	46067	33311	48030	32017	33233	41311	40091	46668	25983	39732
proline	482.983	594	XIC(142.11¡À500ppm)	Infinity	3468218	3503694	3633055	3112394	2688945	2576698	2346781	2394781	1794298	2016652	3930551	2435679	2894916	2521927	3219133	2749400	2318329	2226103	2376790	2432008	3183322
Cyclopropanecarboxamide_ N-(1-naphthyl)-	475.804	320	XIC(143.09¡À500ppm)	Infinity	1577637	1527057	1418475	1594238	1393582	1334258	1472936	1399424	1348979	1323115	2017132	1585810	1701205	1659705	1689333	1622265	1711486	1720000	1758952	1690110	2040014
L-Valine_ 2TMS derivative	404.261	726	XIC(144.13¡À500ppm)	Infinity	8839812	8473661	8984862	6359971	7478465	7243944	6522009	7795782	5132112	5730175	12320256	6961280	8342374	7243546	10583979	10798550	9762040	9114087	9386940	8017339	10117343
valine	404.261	726	XIC(144.13¡À500ppm)	Infinity	8839812	8473661	8984862	6359971	7478465	7243944	6522009	7795782	5132112	5730175	12320256	6961280	8342374	7243546	10583979	10798550	9762040	9114087	9386940	8017339	10117343
1_4-Di(cyclopentyl)benzene	215.471	272	XIC(145.09¡À500ppm)	Infinity	2214023	2698855	3692234	2588136	2665272	3246649	3925564	2894738	3751138	2692088	3792366	3873243	5582625	4640965	3862577	3949911	3125426	3609900	3997478	4068794	2999516
3_4_5-Trifluorobenzyl alcohol_ 2-methylpropyl ether	836.081	460	XIC(145.10¡À500ppm)	Infinity	483100	8328337	5801170	4721865	366661	385872	387615	2756536	371264	2392483	496681	2182291	499488	342465	352444	1237036	1128352	1172699	387155	1139020	415134
arbutin	982.799	281	XIC(147.00¡À500ppm)	Infinity	238812	172600	181333	135655	138302	144613	54761	65982	69939	80125	187208	297711	122813	209747	323451	187394	144975	109061	129534	111471	312400
2-Monoolein	1721.88	506	XIC(147.06¡À500ppm)	Infinity	1330201	966543	766772	653979	577736	521740	519432	487980	418108	431038	653393	484183	554005	464513	417536	350661	377491	304855	360405	382135	180626
Ethylene glycol_ 2TMS derivative:2	220.797	611	XIC(147.07¡À500ppm)	Infinity	594673149	614768003	157822683	414059205	434211894	365761347	450519515	188301660	433445793	496380679	782139577	564331383	552949779	588463898	317840268	703413250	858207719	702225952	834153109	637151185	738967967
Oxalic acid_ 2TMS derivative	326.522	608	XIC(147.07¡À500ppm)	Infinity	113912927	119733891	110536155	99343480	121560505	108731562	53850612	41430712	45969450	47618615	70606631	60080967	56850720	56359964	53651957	23934277	96677646	21431633	33648429	31451297	64086531
Methylmalonic acid	327.96	593	XIC(147.07¡À500ppm)	Infinity	45094448	44687345	44470728	36762761	51200682	43416590	47696732	117567361	52889031	34806744	73864107	77235589	92841189	49557363	62962174	103512588	96677646	125625243	99097241	94888053	74562214
1-(Trimethylsilyl)-3-[(trimethylsilyl)oxy]urea:2	336.407	560	XIC(147.07¡À500ppm)	Infinity	1656127987	1765822717	1698688281	1731027891	1594445341	1725188424	1859093856	1540567606	2109574381	1744373122	2294545127	2318896983	2525091068	2253865816	1940987520	2314581874	2134805673	2297094428	1997440303	2224939790	2021545108
Silanol_ trimethyl-_ carbonate (2:1)	415.968	452	XIC(147.07¡À500ppm)	Infinity	2163534	2079498	2336738	2121298	2480220	2225457	2284718	2332888	2452257	1655994	3043093	2932739	3291635	3069147	2534437	3419535	2798088	3081196	3106477	3051349	3105106
urea	425.887	755	XIC(147.07¡À500ppm)	Infinity	7477857	9162379	6239371	4594136	5457470	3634155	5891068	4954675	22643353	5052372	6259050	5509142	8587044	4691070	6309763	7769893	6313860	5943741	5047791	9739542	8116650
maleic acid	486.783	693	XIC(147.07¡À500ppm)	Infinity	110375912	80778995	58851776	49337443	44267865	38230079	33455994	28900658	26947516	25540640	48615036	37798728	33570990	30457915	29633593	26372519	24131899	23489170	22377186	21453912	52322895
succinic acid	497.402	727	XIC(147.07¡À500ppm)	Infinity	672877910	421338580	307606920	250793968	217955855	179488866	161110402	141083790	121096768	114386690	248625306	158449003	142638589	128657788	125859620	118603420	98123372	99424438	93552453	86304268	325181781
Ethylmalonic acid_ 2TMS derivative	508.556	469	XIC(147.07¡À500ppm)	Infinity	57628622	35795347	23862244	19644755	16479309	14496021	12020865	11003453	9380597	8753141	17134975	11683968	10861975	9037910	8681609	6907344	7067130	6824420	6695354	6024607	28833167
N-Formylglycine_ 2TMS derivative	555.678	489	XIC(147.07¡À500ppm)	Infinity	40865833	29674889	22658989	18370397	15299437	14316559	13249695	11170910	10713986	9795738	17458383	12901873	11993728	10699819	9413627	8007733	7497380	7391873	7366731	7088693	22402604
2_3-Dimethylsuccinic acid	574.724	652	XIC(147.07¡À500ppm)	Infinity	4225692	2703832	2026198	1733717	1143045	1122220	1057027	1014214	918448	916560	2185168	1389594	985653	948700	853947	787268	1016309	932973	628450	633892	4056190
2_3-Dimethylsuccinic acid:2	574.724	652	XIC(147.07¡À500ppm)	Infinity	4225692	2703832	2026198	1733717	1143045	1122220	1057027	1014214	918448	916560	2185168	1389594	985653	948700	853947	787268	1016309	932973	628450	633892	4056190
Glutaric Acid	584.191	616	XIC(147.07¡À500ppm)	Infinity	36582550	21785007	16631408	15139473	13919499	10032942	8082433	8470079	6606110	6522365	32270551	18755130	16087760	13277137	13372049	12412714	9191615	9633652	8889640	8484841	56495013
L-Malic acid	660.115	701	XIC(147.07¡À500ppm)	Infinity	21996113	14512322	11383513	9509309	8583749	7487828	6657422	5814409	5170563	4961412	10694524	7672429	6808112	5816251	5984641	5052747	4803087	4969467	4545513	3961638	12668545
phthalic acid	856.086	622	XIC(147.07¡À500ppm)	Infinity	30990233	18743258	11897134	9027209	7034812	5776867	5009220	4239617	3673947	3364510	5703811	4148565	3576638	3190061	2781457	2392039	2257119	2388312	2146533	1959434	7516560
creatine degr	449.268	641	XIC(147.08¡À500ppm)	Infinity	1607899	1316149	1151835	883921	777985	905988	928833	668063	890557	756820	1142875	851267	1217620	1063492	733842	911009	794432	763291	877901	814514	1232937
L-Gulonolactone	1226.62	391	XIC(147.09¡À500ppm)	Infinity	600751	409677	428114	392125	310109	354158	363213	303806	315415	356018	441173	439754	473541	377706	487416	432315	298348	440165	364498	392224	858059
Dioctyl phthalate	1644.7	663	XIC(149.03¡À500ppm)	Infinity	638091	567385	689424	358042	540483	378910	507051	419173	631044	379384	1038630	450925	467339	409121	541885	475828	421788	380408	558017	1575587	631744
squalene	1758.12	231	XIC(149.11¡À500ppm)	Infinity	689198	256178	371016	244759	390106	235758	270866	322256	259031	225768	161481	197622	298421	272839	528421	287684	314259	283615	443464	299133	346126
Ethyl 2_4-dihydroxy-6-methylbenzoate	954.05	290	XIC(150.07¡À500ppm)	Infinity	674594	379136	265080	214010	181181	129137	153636	147476	116822	92025	280125	191028	145099	172491	104314	118185	191340	106168	136630	154010	579204
1_4 Benzodioxan-6-amine	1465.29	218	XIC(151.12¡À500ppm)	Infinity	136578	242194	159187	169439	116563	116028	148296	124685	136578	138630	178663	122839	114159	133023	123073	101661	85236	102801	121990	96329	594718
Decahydro-1_1_4a_5_6-pentamethylnaphthalene	597.248	303	XIC(151.15¡À500ppm)	Infinity	59780	18749	26432	51101	25728	8610	53283	24837	29990	23819	5469	14910	41449	39486	22238	16050	38385	14588	19454	15843	61583
2-hydroxypyridine	257.385	703	XIC(152.06¡À500ppm)	Infinity	490302031	573075423	169288349	462548744	177594954	351805220	421365834	161530995	386969654	417733327	700589787	537835564	542824548	543015726	206250218	505164020	643987528	627165268	321638553	541040464	630228383
3-Hydroxypyridine	337.398	696	XIC(152.06¡À500ppm)	Infinity	34003838	36232110	14420041	31546406	14422031	24602376	29300368	13172729	27528266	28877380	41757771	32208080	33277209	32416595	14495749	31830408	38325456	37332069	20713518	31788318	38894400
3-Hydroxypyridine:2	337.398	696	XIC(152.06¡À500ppm)	Infinity	34003838	36232110	14420041	31546406	14422031	24602376	29300368	13172729	27528266	28877380	41757771	32208080	33277209	32416595	14495749	31830408	38325456	37332069	20713518	31788318	38894400
4-HYDROXYPYRIDINE	351.414	782	XIC(152.06¡À500ppm)	Infinity	12521889	14891864	3226670	12540817	3485362	8894908	10939147	3074148	10093181	10844969	17984414	13323496	13716261	13433897	3781254	12535711	16501447	15810533	6993408	12921774	15365562
4-Pyridinol_ TMS derivative	351.414	782	XIC(152.06¡À500ppm)	Infinity	12521889	14891864	3226670	12540817	3485362	8894908	10939147	3074148	10093181	10844969	17984414	13323496	13716261	13433897	3781254	12535711	16501447	15810533	6993408	12921774	15365562
3-Pyridinol_ TMS derivative	337.08	478	XIC(152.27¡À500ppm)	Infinity	5338307	6067259	3135317	5646110	274983	4735207	5365625	3160875	5578407	5269057	6373460	5436695	5859961	5521818	196341	5693254	6229038	6252278	3691842	5518176	5275056
N-(2_6-Dimethylphenyl)-1-hexylpyrrolidine-2-carboxamide	263.3	316	XIC(154.04¡À500ppm)	Infinity	1160778	1070010	734262	341792	707257	771805	781830	571433	244332	751435	510912	375157	354282	1124029	757699	953305	1000083	331890	735095	920912	453302
Maleimide	300.042	547	XIC(154.04¡À500ppm)	Infinity	5826012	5802862	5537427	5009997	4342643	4597850	3999182	3798591	3715649	3342663	4717503	4249064	4192047	4314612	4085579	3770392	3659381	3657325	3939853	3759504	4344028
Silane_ chlorodimethylphenyl-	223.689	442	XIC(155.10¡À500ppm)	Infinity	1463993	1386592	1377274	1362068	1190769	1420920	1440942	1214634	1307104	1410733	1665363	1633254	1825936	1800902	1652566	1655833	1676840	1707409	1739330	1791539	1919872
DL-Alanine_ N-methyl-N-(byt-3-en-1-yloxycarbonyl)-_ nonyl ester	331.87	484	XIC(156.05¡À500ppm)	Infinity	8192723	5366634	3933267	3240346	2939092	2631681	2482525	2357877	2217288	2012220	4476454	3227494	2664998	2428655	2404018	2215056	2042320	2116018	2063048	1997598	6546605
2_2'-Bipyridine	629.953	468	XIC(156.07¡À500ppm)	Infinity	20524117	24942502	15750668	22821973	16928292	18843865	21685246	16085073	20218267	22314409	30307234	26541678	26866043	26471557	19438738	24765365	29077966	30249522	23652056	27148699	25204656
oxoproline	691.166	753	XIC(156.09¡À500ppm)	Infinity	525225794	300995422	209763125	168805529	140208707	134304460	116826296	96793023	88460131	85039851	212199547	139444474	123872923	102905925	92848177	97330122	87019817	80682374	74062092	72386938	323905228
Pipecolic acid_ 2TMS derivative	766.117	603	XIC(156.09¡À500ppm)	Infinity	8302691	9788854	9539376	8176498	7774869	7667976	7754349	6895026	6450510	5995533	8949824	8018750	8485434	7585316	7329176	6153033	5393703	5150559	5827275	4995371	6882420
Ritalinic acid_ 2TMS derivative	1152.02	530	XIC(156.09¡À500ppm)	Infinity	1555743	1440294	1169548	786928	848205	812025	736852	648325	595922	554881	1071826	842415	868805	594317	674021	540903	402659	358988	571657	442638	994043
2-Fluoro-4-nitrophenol	238.653	260	XIC(157.08¡À500ppm)	Infinity	825027	788549	706725	663800	680424	634596	628295	638107	617825	613762	883718	798349	779484	757395	755631	728250	762099	812955	801788	772681	976081
2-Phenylpent-4-enenitrile	284.626	244	XIC(157.09¡À500ppm)	Infinity	54122	177994	120566	204859	138360	111711	108732	115181	125958	121993	239753	164940	112082	101684	64205	199734	143834	162535	151890	173916	232241
Isoleucine	477.115	612	XIC(158.14¡À500ppm)	Infinity	3910051	3414067	3825074	2559964	3166876	3086485	2823389	3339636	1971271	2378313	4884039	2626628	3315424	2666458	4337810	4345909	3811225	3548351	3565650	3305855	4274643
3-(Hydroxymethyl)-2-butanone_ TBDMS derivative	536.626	392	XIC(159.06¡À500ppm)	Infinity	2219278	1704528	1040093	1196902	346643	857322	804481	649505	668612	676392	1439937	936404	847420	806564	573614	632205	598917	605228	456367	552782	2082237
N-Formylglycine_ TMS derivative	424.67	313	XIC(160.05¡À500ppm)	Infinity	3860486	3276586	2100142	1859496	1869935	1427208	1259000	1287539	1120417	1093270	1687259	1361904	404108	963105	1049008	1010934	924787	961621	914650	311912	2375691
Ethanone_ 1-(1_2_6_7-tetrahydro-3_8-dimethyl-5-azulenyl)-	221.941	366	XIC(160.06¡À500ppm)	Infinity	5704265	5399418	3257508	4373616	3682924	4551029	5357152	3797130	4683054	4512766	7595679	6971343	6101905	6112299	4730187	6162761	7145293	6788366	5077822	6632635	7375049
L-Aspartic acid_ 2TMS derivative	641.332	559	XIC(160.08¡À500ppm)	Infinity	519304053	387408878	289457608	240830305	213819256	188557287	177965078	155217090	145347559	137780640	215938553	165253837	147519057	132420577	125156023	96417698	88886299	92686982	91292983	85237345	282549188
m-cresol	1509.54	465	XIC(165.13¡À500ppm)	Infinity	6976848	6368862	5916007	6116218	6894378	7236277	8993769	8012545	8633873	8259445	11787895	11090143	11394620	10628098	10478702	11113988	11791478	13917586	12908819	13128852	22137597
trimethylsilyl 9-(3-methyl-5-pentylfuran-2-yl)nonanoate	1509.54	465	XIC(165.13¡À500ppm)	Infinity	6976848	6368862	5916007	6116218	6894378	7236277	8993769	8012545	8633873	8259445	11787895	11090143	11394620	10628098	10478702	11113988	11791478	13917586	12908819	13128852	22137597
toluenesulfonic acid	1673.9	345	XIC(165.13¡À500ppm)	Infinity	961891	853720	664546	738950	526729	723808	644776	432950	548437	672602	674664	632479	649989	793156	544487	544977	638886	522966	447060	549993	993155
2-Pyridinemethanol_ TBDMS derivative	376.95	445	XIC(166.07¡À500ppm)	Infinity	963037	953545	245126	882664	208083	662933	805896	266610	928745	935573	1541472	1258922	1128289	1210315	366108	1061495	1430559	1346108	448210	1054205	1302215
Pyridine_ 4-tert-butyl-2-(tert-butylthio)-	306.463	374	XIC(167.07¡À500ppm)	Infinity	1580597	1109932	1022649	912419	933667	898104	811416	804981	824291	793150	1060166	950324	901526	937025	831376	898204	905158	885305	868658	850182	1418373
Nonanoic acid_ 4-biphenyl ester	686.262	428	XIC(170.10¡À500ppm)	Infinity	2519486	1626041	1270239	1162995	1157148	750312	680963	152988	500841	533507	1677992	894381	950551	803348	962615	970617	595653	679851	635288	680578	1544821
epsilon-Caprolactam	459.675	741	XIC(170.11¡À500ppm)	Infinity	8546216	7662794	7502750	8143757	6644855	8449579	9066162	7261686	8998933	7639100	12213849	9039043	13215875	11327912	6674749	10899994	9757095	8772967	8389449	10330774	8433116
5-Methoxytryptamine 2	1259.43	521	XIC(174.02¡À500ppm)	Infinity	859709	617647	230254	574881	247015	484957	495757	192557	436185	589539	1559697	822030	897327	790412	426773	721414	838493	798442	551793	700097	1445318
Pyruvic acid	261.268	386	XIC(174.06¡À500ppm)	Infinity	902122	588169	2285837	758455	1155999	748665	627246	2025697	624051	674119	1317261	836520	882418	881153	2676760	1064612	966964	1099698	1069982	1006694	1153265
Thieno[3_2-e]benzofuran	448.727	411	XIC(174.06¡À500ppm)	Infinity	5340519	3890543	2387786	1943578	1598698	1456360	1329497	1158003	1120166	1064802	2208770	1515073	1292161	1123192	1006167	928851	1081071	857359	859693	971107	3163709
noradrenaline	623.135	406	XIC(174.11¡À500ppm)	Infinity	5280538	4036826	3152879	2815881	2467362	2334025	2135078	1987272	1923646	1852700	2770956	2232014	2176125	2080484	1978574	1890110	1895374	1937610	1845819	1778958	3117205
Propylamine_ 2TMS derivative:2	249.052	682	XIC(174.12¡À500ppm)	Infinity	39823820	37991472	39594271	35476638	36864506	36671275	38298553	38355909	38686350	33864339	47303482	46230937	47870235	45686313	48716498	45277082	45234741	46790175	47328510	48274414	49928184
Propylamine_ 2TMS derivative:2	249.052	682	XIC(174.12¡À500ppm)	Infinity	39823820	37991472	39594271	35476638	36864506	36671275	38298553	38355909	38686350	33864339	47303482	46230937	47870235	45686313	48716498	45277082	45234741	46790175	47328510	48274414	49928184
n-Butylamine_ 2TMS derivative	310.999	609	XIC(174.12¡À500ppm)	Infinity	4555679	4325261	4298020	4128538	4093407	4151716	4077778	4025733	3911284	3925722	5270330	5060192	4840875	4948003	5057181	5023689	5132701	5160469	5251770	5169957	5614366
glycine 2	490.764	780	XIC(174.12¡À500ppm)	Infinity	8808307	5504446	6858841	6920430	7257790	6692658	5227842	7621081	2733608	4954676	10494528	6673031	5811049	5587464	12284428	13236751	7355242	5977090	5708090	10615891	9975991
putrescine 2	906.18	808	XIC(174.12¡À500ppm)	Infinity	112264688	74873377	126538934	49971903	80051803	75283206	103759662	92932011	73336564	84065898	99418388	89677384	100501469	91416327	85931616	58827253	99371894	77546538	98027289	67024365	126219507
Cadaverine_ 4TMS derivative	1009.77	697	XIC(174.12¡À500ppm)	Infinity	43275085	35508234	49989950	28893590	34435993	30064437	38761256	32848238	27951072	34726868	49838407	37035290	43063207	41084268	34685381	27847770	41981987	35181810	36517386	27532937	47776617
(2-Ethyl-butanoyl)thiourea	1042.98	276	XIC(174.12¡À500ppm)	Infinity	1102659	156814	582607	236960	597065	619132	547556	261529	534193	680679	272979	718259	583314	514430	644898	363296	758052	698264	500269	623013	497919
putrescine 1	1067.54	695	XIC(174.12¡À500ppm)	Infinity	1892080	1318314	2431303	1037246	1555862	1503943	1968246	1825332	1654538	1539728	1818086	1655273	1807507	1349790	1294141	1075419	1647941	1318133	1530967	1080659	2089120
Tryptamine_ 3TMS derivative	1260.14	473	XIC(174.12¡À500ppm)	Infinity	3197475	2189180	804177	1996738	853405	1648225	1781200	733740	1551315	2174645	3949798	2175453	2406564	2126746	1152770	1935383	2330629	2248239	1571691	2013133	3584535
3H-Thiazolo[4_5-d]pyrimidine-2-thione_ 7-dimethylamino-3_5-dimethyl-	230.014	320	XIC(175.12¡À500ppm)	Infinity	4992534	4897265	4973406	4483334	5453519	4813476	5684245	5441804	5475270	4429781	6889087	6794705	7125996	5903513	5797737	6847275	5500934	6803163	7002699	7101692	5973137
benzoic acid_ 2_3_4_5_6-pentamethyl-_ ethyl ester	665.149	395	XIC(175.13¡À500ppm)	Infinity	2896171	2954984	3545512	2814944	2721923	2948578	3871304	2613863	3588984	2564193	3224554	3125766	5479449	4192524	3213684	3288590	2663542	3141008	3358124	3409536	2512225
beta-Alanine 1	264.815	518	XIC(176.10¡À500ppm)	Infinity	4547882	5082261	5161649	4762180	5169027	4448124	4639734	5013828	5235098	4339764	6268639	6064156	5570713	4702647	5337214	5556286	4971399	5323549	5094030	5031008	5146355
glycolic acid	281.946	686	XIC(177.08¡À500ppm)	Infinity	39096590	25767620	16831482	19862452	14682662	17150648	17256537	10889543	16357721	16081330	27627761	21169376	19497928	17443193	10771242	16117588	17681420	17183422	12583677	16164506	31784600
phenanthrene	1179.61	128	XIC(178.00¡À500ppm)	Infinity	27499	11562	118285	556	70591	96141	12826	4088	57811	92118	18239	19085	102742	126527	137955	8121	119162	9209	105669	13331	167602
benzoic acid	438.057	749	XIC(179.06¡À500ppm)	Infinity	16557368	12657230	10334288	9917140	9142941	8710235	8202822	8156702	6486446	6261190	13062888	9359571	10735309	10506777	9584577	10280687	9121116	8632143	10992830	10029996	13743034
Benzoic Acid_ TMS derivative	438.057	749	XIC(179.06¡À500ppm)	Infinity	16557368	12657230	10334288	9917140	9142941	8710235	8202822	8156702	6486446	6261190	13062888	9359571	10735309	10506777	9584577	10280687	9121116	8632143	10992830	10029996	13743034
nicotinamide	654.805	385	XIC(179.07¡À500ppm)	Infinity	3302846	2222541	2391445	2802042	2389461	2201420	1901763	1973110	1628801	2043829	4246297	2580365	2814843	2803730	2551577	3935404	3580549	3029144	2451556	2484106	3192354
nicotinic acid	481.354	522	XIC(180.05¡À500ppm)	Infinity	3952344	3295194	2711287	2285958	2445696	1316167	1067612	1692395	969382	966921	2921163	1432881	1652930	1548325	2600403	1593143	1421913	1583350	1622317	1378231	3203934
picolinic acid	506.565	756	XIC(180.05¡À500ppm)	Infinity	56909057	38696243	27891432	22479924	19168845	16903906	15617331	13955815	12994554	12468159	24454389	17409878	15061889	13278274	12270255	11007784	10677805	10361666	9979858	9737906	33004317
Picolinic acid_ TMS derivative	506.565	756	XIC(180.05¡À500ppm)	Infinity	56909057	38696243	27891432	22479924	19168845	16903906	15617331	13955815	12994554	12468159	24454389	17409878	15061889	13278274	12270255	11007784	10677805	10361666	9979858	9737906	33004317
Pyrazinoic acid_ TBDMS derivative	483.782	319	XIC(181.05¡À500ppm)	Infinity	7935091	5478678	3996104	3119684	2619386	2199278	2021393	1865653	1736758	1602266	3218849	2298626	1983534	1776350	1537796	1340787	1365359	1396169	1290870	1259100	4155032
3-(Methylthio)benzoic acid_ TMS derivative	793.966	307	XIC(181.08¡À500ppm)	Infinity	2959475	1873695	1353711	1205636	985235	939086	886110	758350	779288	736682	1518927	1053878	959381	868500	710389	729677	670086	711237	685168	658999	2022870
2_6-Dimethyl-4-phenylpyridine	512.259	322	XIC(183.06¡À500ppm)	Infinity	1038313	767974	626585	637646	496740	548079	460247	471554	402707	387691	708061	523654	46753	538968	445176	460966	412962	400960	347492	372406	818081
4-Imidazoleacetic acid_ trimethylsilyl ester	580.973	283	XIC(183.07¡À500ppm)	Infinity	7657851	5793384	3914367	3559077	2738864	2514469	2232180	1939997	1841534	1663536	3242851	2118060	1773363	1669483	1465278	323814	1312945	1341196	1171368	1030900	4626990
2-Aminocaprylic acid_ N-ethoxycarbonyl-_ undecyl ester	387.355	279	XIC(186.02¡À500ppm)	Infinity	764166	998809	80385	705604	81315	480355	608059	62102	581977	648961	1136440	801812	747860	740666	72825	702620	953840	932567	93260	733070	943867
N_N-Diethyl(trimethylsilyl)carbamate	268.878	471	XIC(189.12¡À500ppm)	Infinity	64127805	64874748	64915934	60753378	68595257	60790277	69978229	66956309	70201351	55939296	89284305	84711734	87132572	71711084	70174478	83601730	70872253	82630139	82332165	82339574	76955572
N_O-Bis(trimethylsilyl)carbamate	273.473	446	XIC(190.08¡À500ppm)	Infinity	20166039	17986614	16423461	14915205	14606115	13855213	13476399	14124496	12939747	11636203	19637399	17202664	16653194	12632334	14705275	15589027	14343496	15004352	14670895	14255625	22561475
lactic acid	269.524	860	XIC(191.10¡À500ppm)	Infinity	63856273	47463776	36169558	31422250	27641609	25611845	24949327	22767462	22070499	19965289	37941928	30747908	28147079	24809698	24011576	22385551	20900309	22981380	21433673	22394999	53170290
Ethylene glycol_ 2TMS derivative	340.608	498	XIC(191.10¡À500ppm)	Infinity	80952091	82049094	80213683	84589581	89466563	83732095	88170338	89452923	93878967	80284459	114329431	106362445	106115624	94067419	94327988	111581568	102359059	113949349	107493022	107351655	102011528
¦Â-iso-Methyl ionone	1945.23	290	XIC(191.17¡À500ppm)	Infinity	763370	483951	388230	224654	244207	230675	242950	240738	165898	238699	213194	341834	128343	178560	224210	188319	239744	176794	219366	322632	886939
phenylalanine 1	792.985	583	XIC(192.12¡À500ppm)	Infinity	1432050	1160578	1247701	1298334	1411315	1001301	827004	1094955	589561	801001	2006034	1037377	1176078	1041636	1674643	1927928	1274513	1273287	1206790	1256897	1396706
3-Aminobenzoic acid_ TBDMS derivative	553.234	322	XIC(194.07¡À500ppm)	Infinity	5044441	3296991	2399244	838941	1707051	949203	786386	825759	1242495	1143836	2210649	1576724	1381251	811074	1147482	1080803	1076969	638126	946816	580284	3423447
Quinoline_ 2-(1H-imidazol-4-yl)-	488.837	439	XIC(195.10¡À500ppm)	Infinity	7261800	6938700	6677160	6838950	6386099	6154109	6029332	6015498	5901396	5849520	8116372	7227370	7398937	7030370	6878267	6920567	7197450	7147876	7190230	6931107	8050908
2-Hydroxy-9-fluorenone	380.097	185	XIC(196.08¡À500ppm)	Infinity	144358	144782	149877	145649	112890	20563	115236	111346	138778	117097	147060	129060	156035	157421	162463	145229	159164	117487	139233	120350	124329
guaiacol	431.735	525	XIC(196.11¡À500ppm)	Infinity	1343555	1567909	125793	1495701	139740	1002790	1162149	142351	1142671	1149370	2131453	991242	1318242	1270980	178215	1402777	1819286	1680391	486316	1313347	1569433
2_3-Dihydro-2-ethyl-1H-cyclopenta[b]quinoxaline	626.09	254	XIC(198.08¡À500ppm)	Infinity	217130	222964	200723	183106	172710	158772	162319	153045	172561	140982	156277	119026	147583	132410	144626	132745	108435	136428	128330	128324	136736
Decanoic acid_ ethyl ester	1387.73	253	XIC(200.14¡À500ppm)	Infinity	209066	275696	1487945	141930	1304988	108393	123733	1154902	203828	137329	204302	101855	183515	162468	1547275	145727	198337	191811	1445717	101597	187915
caprylic acid:2	451.526	540	XIC(201.13¡À500ppm)	Infinity	4096394	4311237	4644475	3944817	3744211	3757900	780813	4112802	755410	613355	5035614	3540795	2264384	1838602	4529843	3823000	3578328	3579094	3963697	4264892	2108324
caprylic acid	451.526	540	XIC(201.13¡À500ppm)	Infinity	4096394	4311237	4644475	3944817	3744211	3757900	780813	4112802	755410	613355	5035614	3540795	2264384	1838602	4529843	3823000	3578328	3579094	3963697	4264892	2108324
D-Lyxose_ 4TMS derivative	1079.41	331	XIC(204.11¡À500ppm)	Infinity	506419	266813	446181	421894	412948	361216	247206	294777	182911	219052	564029	296065	358046	352384	482163	501432	414778	413193	406376	372262	502282
glycerol	457.387	768	XIC(205.11¡À500ppm)	Infinity	527150509	543399429	577242861	497716849	492132135	466744984	458230958	509615077	369956803	377059876	696061357	519649963	560424294	589779007	566739854	553922192	597341743	516081326	760131820	664219728	545840841
Butylated Hydroxytoluene	682.628	556	XIC(205.16¡À500ppm)	Infinity	15211227	8652134	8057352	1375030	1766933	2240338	3347002	2001462	1406009	2111128	3988823	4462314	1506275	1294981	2375460	884556	707452	1536969	2008306	4242641	17462452
4-tert-Octylphenol_ TMS derivative	214.16	440	XIC(207.04¡À500ppm)	Infinity	4140725	3994327	3476949	3689406	3327950	3434263	3653154	3385280	3848398	3215742	4592471	4529432	4962899	4329102	3002642	4351474	3891563	4336417	4183776	4514573	4989957
Cyclotrisiloxane_ hexamethyl-	232.992	400	XIC(207.04¡À500ppm)	Infinity	2802970	2855602	2483898	2498525	2773499	2521018	3051048	2703432	2938182	2460218	3908671	3641902	3688879	3060666	2712337	3592444	3238812	3645838	3354336	3638572	3571665
4-tert-Octylphenol_ TMS derivative:2	236.46	520	XIC(207.04¡À500ppm)	Infinity	4609510	2802490	4481444	3358100	6255595	3858220	2834558	3847329	2575972	2476283	3235239	3264292	3817565	2998124	7372101	3483476	2843518	3519639	5044252	6308226	5374705
7_7_9_9_11_11-Hexamethyl-3_6_8_10_12_15-hexaoxa-7_9_11-trisilaheptadecane	240.223	422	XIC(207.04¡À500ppm)	Infinity	4868182	5164484	7108986	5243835	7180052	5681793	6336937	7592171	5916055	4044691	7037985	7195100	7579185	6127777	7113788	8839985	5977164	7260476	8637158	7008241	5049361
4-tert-Octylphenol_ TMS derivative:3	810.867	492	XIC(207.12¡À500ppm)	Infinity	35756713	23894516	21233009	3023498	7530790	5486481	11917796	6036866	5779058	7974778	13801581	15334124	4245198	4273691	7113351	4529939	1779121	4455760	6747643	17598567	44359042
4-Chlorobenzoic acid_ TBDMS derivative	592.18	221	XIC(213.01¡À500ppm)	Infinity	399446	892527	132967	334047	110682	200924	228962	105552	210742	250552	365572	258263	238088	232659	137044	199546	311171	287601	119225	224841	462932
Phenylalanine_ DL_ ¦Á-methyl-N_N-di(n-propyl)-_ n-propyl ester	264.484	326	XIC(214.11¡À500ppm)	Infinity	7712363	8117350	7583877	7350756	7262376	7271368	6970643	7480273	7414276	6804842	9495367	9126976	8160714	8186177	8470556	7981990	8425388	8689573	8712951	8229097	9371299
Pelargonic acid	543.687	495	XIC(215.14¡À500ppm)	Infinity	2913046	3270082	3398453	2986241	2660051	2826842	1765054	2514456	1600289	1513408	3348879	2225635	2971424	2753946	3124876	2902550	2616598	2303511	3097254	2813242	2966870
2_4-Dimethyl-5_8-dimethoxy-6-aminoquinoline	500.823	335	XIC(217.06¡À500ppm)	Infinity	521889	602606	47371	511384	530995	434909	393111	353054	265798	382680	618544	412855	502204	439607	77789	410870	604007	505938	174981	411684	579517
Sedoheptulose	1079.41	331	XIC(217.07¡À500ppm)	Infinity	186128	249422	314540	416333	369715	337001	165999	293161	154659	140888	573886	282065	403484	363169	465114	528197	460928	439360	386348	403176	500535
Propanoic acid_ 2-oxo-3-(trimethylsilyl)-_ trimethylsilyl ester	291.914	637	XIC(217.08¡À500ppm)	Infinity	7596931	5125621	4056356	3464242	3087525	2866616	2537237	2347818	2279250	2065345	4030960	3055815	2678946	2516548	2266450	2240119	2297672	2235791	1944608	2064073	5928666
¦Â-D-Galactofuranoside_ ethyl 2_3_5_6-tetrakis-O-(trimethylsilyl)-	746.85	538	XIC(217.11¡À500ppm)	Infinity	466566	1114996	1916549	712218	475832	273118	928665	1323977	161328	714641	995870	317778	685891	794632	636254	1380377	426463	526882	539445	903366	451069
Glucose-1-phosphate	746.85	538	XIC(217.11¡À500ppm)	Infinity	466566	1114996	1916549	712218	475832	273118	928665	1323977	161328	714641	995870	317778	685891	794632	636254	1380377	426463	526882	539445	903366	451069
Lyxose 1	841.831	565	XIC(217.11¡À500ppm)	Infinity	711974	1255893	2031720	1204599	1736013	740332	600797	1408123	483880	670130	1358896	870019	900009	786841	1935785	1045942	976513	945012	1172873	869086	800018
3_4_5-Trihydroxypentanoic acid_ tetrakis(trimethylsilyl)-	1250.83	487	XIC(217.11¡À500ppm)	Infinity	807258	628192	175974	422806	124575	451517	473855	84361	307999	388016	752116	532167	513649	465979	150154	364992	589135	509524	121344	349958	808501
cytidine-monophosphate degr prod	1548.12	415	XIC(217.11¡À500ppm)	Infinity	2115562	1323520	1855661	2459191	2097437	1091908	887434	1273199	810873	1069451	2329675	1359904	1607882	1797769	2117000	2135963	1728398	1801658	1635275	1230424	1523725
tyrosine 1	935.175	534	XIC(218.00¡À500ppm)	Infinity	864378199	870343308	952417599	892410622	868809972	880232816	883260527	851713293	844774638	746138227	1346242328	1253006440	1206831306	1141093841	1294175155	1209612542	1202405871	1013273613	1109961124	1092747014	1266338966
phenylalanine 1:2	792.985	583	XIC(218.10¡À500ppm)	Infinity	1833399	1486154	1648439	1619110	1827510	1303503	1033022	1379696	757694	1038716	2496633	1290243	1467286	1346891	2171644	2454022	1593833	1590127	1537270	1580680	1736394
Trimethylsilyl 3-(3-chloro-4-[(trimethylsilyl)oxy]phenyl)-2-[(trimethylsilyl)amino]propanoate	935.175	534	XIC(218.11¡À500ppm)	Infinity	2689300703	2617468616	2844534164	2668566963	2589807719	2576485235	2648153136	2575461828	2534160937	2234585947	2943668122	2788696038	2728910685	2634984277	3052878688	2872166380	2877382109	2413462190	2682626236	2627770829	2750394329
tyrosine 1:2	1116.83	588	XIC(218.11¡À500ppm)	Infinity	2727984	2304646	2606303	2517233	2934470	1910449	1422258	2102407	1078602	1440483	3832703	1802113	2323892	2134017	3366954	3664583	2560741	2497833	2503396	2346827	2468002
2-Monopalmitin:2	1654.45	674	XIC(218.12¡À500ppm)	Infinity	1790338	1321972	1117680	967082	840056	852885	768558	712810	686034	740483	899339	784921	741798	798764	798250	594802	678303	549406	531589	546256	1479137
2-Monooleoylglycerol trimethylsilyl ether	1718.82	572	XIC(218.12¡À500ppm)	Infinity	888236	609907	485359	414562	380556	340710	325478	270465	256675	277284	412894	332558	299735	268473	244226	221950	210478	223012	209657	209913	580161
Glycine_ 2TBDMS derivative	540.636	560	XIC(218.14¡À500ppm)	Infinity	5403850	6060270	5858424	7122459	6393560	6674799	5649022	6326857	5560150	5907624	7047021	6349916	7020410	7068689	7965189	7531682	7018301	7407508	7063098	6938135	5802777
L-Leucine_ N-methyl-N-(3-chloropropoxycarbonyl)-_ heptadecyl ester	217.261	271	XIC(220.10¡À500ppm)	Infinity	3451862	3453819	3618193	3282123	3221575	3440064	3607443	3392061	3569878	3377926	4139395	4114980	4359601	4232949	3808204	4039048	4096847	4261686	4238874	4311737	4119710
3-Phenyllactic acid	750.955	554	XIC(220.10¡À500ppm)	Infinity	73685	64467	38606	33198	22563	4801	17836	13313	9385	14957	73592	8221	53122	47510	27697	55647	5859	13630	20086	6323	98234
2-Amino-4-(1-ethylpropyl)-4H-benzo[h]chromene-3-carbonitrile	847.836	483	XIC(221.14¡À500ppm)	Infinity	5447101	3362334	3214321	504882	1122552	888624	1663897	894577	849366	1154858	1887513	2114156	709436	704792	1095133	728692	387882	646138	980526	2284046	6429650
Cumic Acid	551.002	378	XIC(221.17¡À500ppm)	Infinity	614511	620285	598432	607022	596236	587269	655024	610271	654961	595972	691446	697873	768655	684696	605310	728344	625276	704422	727757	723637	627338
N-Acetyl-L-leucine 1	703.881	386	XIC(228.07¡À500ppm)	Infinity	1967109	1031780	651247	508527	435043	385474	358798	299909	293540	262020	613351	373033	299791	271952	248651	201465	214111	193094	280213	189139	1180709
Decanoic acid_ TBDMS derivative	1311.3	367	XIC(229.14¡À500ppm)	Infinity	858022	1190610	1288845	1284115	1126016	1090624	1241906	1126501	1216888	1150598	1233063	1432213	1570046	1523072	1406494	906750	756666	789960	806179	765432	880452
trans-4-hydroxy-L-proline 2	695.922	682	XIC(230.14¡À500ppm)	Infinity	5644461	3516602	4122233	4285614	6147089	3762658	2302881	2650557	1520759	2709849	9851226	4385952	4564717	4271608	7692750	15574539	6267399	6224500	6198405	8521919	5366924
iminodiacetic acid	700.009	740	XIC(232.12¡À500ppm)	Infinity	240384676	160743789	113464770	98344539	88543803	77456223	68564381	63590919	55579901	54236077	90766689	64734432	54812609	49315405	48142560	41260022	38212768	37896189	36691681	35289902	126881381
Benzoic acid_ 4-[(2_4-dimethoxy-6-pentylbenzoyl)oxy]-2-methoxy-6-pentyl-_ methyl ester	927.589	260	XIC(235.15¡À500ppm)	Infinity	5149459	3058743	2873921	432436	1050047	748006	1469139	776032	683613	974795	1576231	1855488	492178	588741	874893	472110	248652	516194	760290	1998848	5721437
pyrogallol	709.517	764	XIC(239.06¡À500ppm)	Infinity	7810913	4698873	3290312	2683731	2231403	2057700	1856791	1707590	1498630	1400769	3411607	2357478	1976376	1688172	1546151	1336936	1219129	1194661	1127568	1087962	5326540
Dehydroabietic Acid	1563.9	792	XIC(239.18¡À500ppm)	Infinity	4908402	3663121	3526545	3051467	3675080	2978456	3533347	3329221	3422101	2585750	4480622	4005138	4017223	3085338	3032283	3825195	3024554	3639676	3609254	3703523	6273144
2_3-Dihydroxypyridine	497.986	645	XIC(240.09¡À500ppm)	Infinity	6268720	6171549	3456796	4879436	3135872	3823653	4150407	2509560	3749069	3842467	6237005	4845386	4836710	4636944	2881167	4177672	4665312	4726652	3216249	4175517	6012376
3_4-Dihydroxypyridine	650.15	454	XIC(240.09¡À500ppm)	Infinity	499213	641327	681124	627165	635277	588473	627493	575097	593301	543333	664153	639180	729379	727568	740445	624750	545916	567482	595456	536309	478446
Methyl Phosphate:2	367.825	783	XIC(241.05¡À500ppm)	Infinity	28513018	7366931	41695844	22131740	25368627	20295123	19869153	31106470	15815285	15109931	41405001	16747351	25132574	21390260	24254506	40385218	20323092	23575744	28285845	21674487	29767041
Methyl Phosphate	367.825	783	XIC(241.05¡À500ppm)	Infinity	28513018	7366931	41695844	22131740	25368627	20295123	19869153	31106470	15815285	15109931	41405001	16747351	25132574	21390260	24254506	40385218	20323092	23575744	28285845	21674487	29767041
Phosphoric acid_ bis(trimethylsilyl)monomethyl ester	598.691	469	XIC(241.05¡À500ppm)	Infinity	594374	588147	499930	467500	443238	397240	364719	352921	324978	298190	485736	408184	368827	319598	322435	287475	274348	268469	263044	260924	417841
Parabanic acid_ bis-O-(trimethylsilyl)-	581.669	551	XIC(243.09¡À500ppm)	Infinity	1598614	1677747	1526319	1295146	1189220	1159360	1152163	990332	960425	897048	1291704	1089606	1148771	1081668	997265	877138	830086	785122	775690	748252	1148669
Dodecanol	738.894	469	XIC(243.20¡À500ppm)	Infinity	1718170	1673741	1435075	1191028	1076356	1314719	1123455	1037930	983980	994939	1492356	1141702	1159958	1091190	1069858	1222448	1073832	1064840	1013335	1093710	1540779
Isophthalic acid_ di(2-fluorophenyl) ester	1495.54	430	XIC(243.21¡À500ppm)	Infinity	422403	267039	228458	181386	76747	167700	215067	186235	247688	167356	266935	282238	214916	189841	193246	201151	177274	215358	185926	226964	498935
fumaric acid	532.379	733	XIC(245.07¡À500ppm)	Infinity	152107117	105409152	81073329	68608512	61872184	51377512	45111630	40297360	36223353	35111447	68560913	47325570	42858917	38625287	38734823	34708170	29831218	29697354	28119658	26885037	72859581
9H-Thioxanthen-9-one_ 2-chloro-	1357.28	231	XIC(246.11¡À500ppm)	Infinity	634181	562932	35410	639487	67434	353722	580045	55428	421677	543740	695256	391300	423384	478840	24219	486078	781811	581890	562120	495914	592043
Methylmalonic monoamide_ O_O'-bis(trimethylsilyl)-	720.448	448	XIC(246.13¡À500ppm)	Infinity	4147837	4150180	4400937	4063962	4245706	3994980	4535495	3993573	4480705	3411531	4777324	4914777	5758914	4831928	4442622	4986390	4332250	4767841	4924845	4866218	4217951
glutamic acid	786.032	676	XIC(246.14¡À500ppm)	Infinity	3977797	3057841	3419188	2810951	3731958	2925099	2330711	2867227	1394062	1931883	5121404	2394113	3593493	2644313	4345126	5373240	3790484	3693861	3875208	2683699	3111713
glutamic acid:2	786.032	676	XIC(246.14¡À500ppm)	Infinity	3977797	3057841	3419188	2810951	3731958	2925099	2330711	2867227	1394062	1931883	5121404	2394113	3593493	2644313	4345126	5373240	3790484	3693861	3875208	2683699	3111713
Methyl 1_4_7_8-tetrahydro-2_7_7-trimethyl-5(6H)-oxo-4-propyl-3-quinolinecarboxylate	234.764	478	XIC(248.06¡À500ppm)	Infinity	7309252	7814804	6556939	7075280	5890095	6968428	7726948	5899118	7588455	7286484	9746065	9403992	10591654	10193128	8030676	9203213	9744319	9959925	8628057	10001585	8910375
2-Pyrimidinamine_ 4_6-dimethyl-N-(1-naphthalenyl)-:2	244.217	435	XIC(248.06¡À500ppm)	Infinity	19902729	22831977	19430920	21006289	19449791	21512114	22945965	18944175	22329601	22511457	29324360	27570789	26504998	28075387	24949653	30815977	31570157	32137096	28663670	32063037	23301772
2-Pyrimidinamine_ 4_6-dimethyl-N-(1-naphthalenyl)-:2	244.217	435	XIC(248.06¡À500ppm)	Infinity	19902729	22831977	19430920	21006289	19449791	21512114	22945965	18944175	22329601	22511457	29324360	27570789	26504998	28075387	24949653	30815977	31570157	32137096	28663670	32063037	23301772
Girinimbine	514.558	321	XIC(248.08¡À500ppm)	Infinity	1325059	1362183	1443481	1308422	1466601	1378399	1614748	1430029	1602286	1226313	1777540	1638253	1996182	1541322	1426138	1703538	1376193	1605932	1624445	1654127	1383230
Ethylphosphonic acid_ 2TMS derivative	590.95	355	XIC(255.07¡À500ppm)	Infinity	86490	12172	75017	60270	70577	94636	17703	60952	49208	50103	21517	63057	89182	38286	27492	114285	121788	95645	113988	93792	83095
2-(4'-Methoxyphenyl)-2-(3'-methyl-4'methoxyphenyl)propane	641.675	512	XIC(255.09¡À500ppm)	Infinity	22582658	14808187	10757053	8875367	7617058	6759905	6212183	5517573	5220047	4823135	10587490	7555755	6496253	5533369	5016298	4199847	3865951	3765623	3660346	3446024	15663648
thymine	578.484	667	XIC(255.10¡À500ppm)	Infinity	7930176	7158612	7122450	5992424	7769734	6142741	5185169	5969315	4911247	4328295	4814644	3344522	3220996	2890852	6399672	4881562	4058314	3624633	6609634	5284038	4627683
uracil	519.29	767	XIC(256.10¡À500ppm)	Infinity	39135478	32660316	27346935	22920117	21441340	17845169	16587682	16018531	13495866	12895888	21937972	15654183	14689947	13131078	13942293	12163888	10941543	11200537	10722993	10061166	22718352
4_6-Dioxoheptanoic acid_ tris-(O-trimethylsilyl)-	614.984	430	XIC(257.10¡À500ppm)	Infinity	5893731	3724354	2708505	2239197	1850897	1705219	1530781	1355535	1259095	1137979	2628701	1860676	1541475	1299202	1208958	1042171	993030	948902	882349	837423	4236020
Itaconic acid_ 2TMS derivative	529.828	698	XIC(259.08¡À500ppm)	Infinity	6964052	4442346	3070678	2361071	1981023	1659111	1440343	1227837	1091703	1009349	1432173	1019151	868792	748035	694315	569539	574243	526944	516658	464102	1987800
adenosine:2	1685.47	798	XIC(259.12¡À500ppm)	Infinity	721067	584160	643835	586667	773725	397859	248810	516804	257657	247565	847234	286045	407001	330261	797323	632406	407604	565603	669084	493207	603712
alpha-Aminoadipic acid	882.388	633	XIC(260.15¡À500ppm)	Infinity	1942812	1401995	1688808	2390592	3866764	1239848	700166	1220517	478875	931943	4729044	1535845	2067333	1842475	3580732	3744138	1447450	1858978	1890140	2121997	1807960
N-Phthalylglycine_ TMS derivative	1047.82	291	XIC(262.06¡À500ppm)	Infinity	345375	210819	149694	125392	97997	88946	90440	66496	58918	64396	106702	85331	129317	67650	65822	61508	50886	46367	43531	64429	156484
N-(2-hydroxyethyl)-iminodiacetic acid 2:2	997.37	696	XIC(262.14¡À500ppm)	Infinity	2003493	2284489	1825093	1501032	1247760	1088022	1036706	906383	794352	761153	784897	707187	691039	592031	579326	348242	314438	374083	329601	313265	614132
linoleic acid:3	1403.17	685	XIC(262.23¡À500ppm)	Infinity	13022895	5123344	3789208	2993367	2641573	2334689	2186010	2143912	1786297	1703056	2598740	1961912	1760108	1595762	1583986	1358320	1340962	1319718	1381954	1180701	8069558
2_4-Di-tert-butylphenoxytrimethylsilane	710.663	336	XIC(263.18¡À500ppm)	Infinity	6579467	6092679	6009726	5489789	5032145	5437124	5041649	4828535	4944692	4700578	6684104	5889006	6242226	5943142	5823027	5798678	5753153	5590694	5612426	5650092	7246736
adenine	1038.92	612	XIC(264.11¡À500ppm)	Infinity	1953715	2243278	3201551	2406812	3004663	2170287	2077069	3077511	1775809	1918481	2238608	1302077	1971693	1857402	3130364	2738100	2285957	2291711	2449351	1995345	1193568
oleic acid	1417.19	733	XIC(264.24¡À500ppm)	Infinity	20953872	6814143	4832864	3814606	3414111	2911042	2715553	2521689	2317158	2191873	4099710	2856903	2352884	2179390	2140896	1879179	1780702	1767599	1702507	1748465	16771318
4-Hydroxybenzoic acid	795.028	479	XIC(267.09¡À500ppm)	Infinity	2553990	1472598	1039602	815675	681165	573928	523864	430650	431559	403182	726759	520168	447157	402401	405216	316470	301388	338753	317990	298128	1094214
3_4-Dihydroxyhydrocinnamic acid_ 3TMS derivative	1122.6	337	XIC(267.12¡À500ppm)	Infinity	331250	228364	165213	121801	109824	90488	114169	82019	69933	55831	87684	68602	101093	71407	55079	64315	52460	83033	53233	46271	120661
2-Hydroxycyclohexane-1-carboxylic acid_ bis(trimethylsilyl) deriv.	717.932	527	XIC(273.09¡À500ppm)	Infinity	445564	264754	181318	169639	136054	120786	112028	96172	107767	92420	246632	167870	141101	131704	98869	98577	93997	100727	107775	102750	438795
3-Hexenedioic acid	717.932	527	XIC(273.09¡À500ppm)	Infinity	445564	264754	181318	169639	136054	120786	112028	96172	107767	92420	246632	167870	141101	131704	98869	98577	93997	100727	107775	102750	438795
citric acid	989.665	700	XIC(273.10¡À500ppm)	Infinity	56553798	46159908	30865509	22580921	17174521	12385251	9955644	8020027	6211636	5289202	3929835	2855313	2420177	2129297	2484285	1433824	1331916	1392557	1397319	1151627	4502518
adipic acid	677.763	648	XIC(275.11¡À500ppm)	Infinity	4203450	2547284	1734130	1390977	1127005	991812	882405	751267	692486	643130	2550778	1575952	1238350	985277	900153	703865	627871	618953	576795	571328	5433128
N-(2-hydroxyethyl)-iminodiacetic acid 1	925.738	658	XIC(276.15¡À500ppm)	Infinity	9053241	7879932	6125561	5111775	4583165	4005312	3646809	3273646	2941379	2742145	4440753	3458853	3076883	2669036	2467194	1976204	1780547	1750987	1675420	1580641	4315700
2_5-Di-tert-butyl-4-((trimethylsilyl)oxy)phenol	846.933	390	XIC(279.17¡À500ppm)	Infinity	2420157	1921850	2283865	1883063	1502410	1846889	1491955	1339227	1429118	1588833	1627308	1471223	1811463	1999073	2213100	1605966	1775343	1452556	1470296	1412551	2408533
2_5-Di-tert-butyl-4-((trimethylsilyl)oxy)phenol:2	846.933	390	XIC(279.17¡À500ppm)	Infinity	2420157	1921850	2283865	1883063	1502410	1846889	1491955	1339227	1429118	1588833	1627308	1471223	1811463	1999073	2213100	1605966	1775343	1452556	1470296	1412551	2408533
Cyclotetrasiloxane_ octamethyl-	231.752	567	XIC(281.05¡À500ppm)	Infinity	9751243	9909602	8530263	9089934	8224767	9210129	9828609	8202997	9872199	9498719	13485440	12268763	12350844	11676729	10073583	12519823	12677002	13121436	11292473	13108900	13121198
3-hydroxybenzoic acid	734.932	538	XIC(282.10¡À500ppm)	Infinity	1220874	796315	584050	462981	379396	357849	304156	263907	243683	230968	441561	340626	301673	294546	233699	225635	227821	209226	188476	180691	618138
Aconitic Acid	916.714	583	XIC(285.07¡À500ppm)	Infinity	764677	837060	630274	534791	427652	374345	345684	264402	240963	210211	239573	188775	157187	126225	123846	98007	98305	112590	83881	90223	254903
Myristic Acid	1024.45	702	XIC(285.22¡À500ppm)	Infinity	15995111	9650076	9440981	4641847	6759907	4508222	5112413	4967337	3756198	3888715	5861345	5182487	3339993	3192684	4577366	3282973	2541963	2840472	5152887	5043095	14254545
pimelic acid	771.127	608	XIC(289.13¡À500ppm)	Infinity	1501030	833156	550700	434901	339345	312144	263074	236034	193385	187411	502079	326329	268239	226860	214883	175831	153310	143331	154827	133222	1021132
N-(2-hydroxyethyl)-iminodiacetic acid 2:2	997.37	696	XIC(290.13¡À500ppm)	Infinity	17366600	19987957	16226816	13533903	11244677	9571809	9236170	7955682	7157881	6606144	6706921	5685674	5802804	4832907	4710749	2795422	2397936	2537237	2570492	2311340	4813355
N-(2-Acetamido)iminodiacetic acid_ 3TMS derivative	1302.83	433	XIC(290.13¡À500ppm)	Infinity	8537231	11377916	9937310	8758158	8292755	7240225	7253329	6700188	6272046	5949493	5384888	4828117	5190265	4464023	4747712	2546895	2138375	2342487	2526596	2282454	3003852
D-Glyceric acid	510.756	692	XIC(292.13¡À500ppm)	Infinity	4142326	3092926	2319458	2009742	1724088	1493655	1357774	1237251	1181434	1173444	2062564	1384727	1344839	1142489	995208	1202370	1132710	1024221	840737	977206	2326262
D-Glyceric acid:2	510.756	692	XIC(292.13¡À500ppm)	Infinity	4142326	3092926	2319458	2009742	1724088	1493655	1357774	1237251	1181434	1173444	2062564	1384727	1344839	1142489	995208	1202370	1132710	1024221	840737	977206	2326262
Butylated Hydroxytoluene_ TMS derivative	858.921	285	XIC(293.20¡À500ppm)	Infinity	130395	92792	80920	31650	29659	28882	58536	35284	29268	16108	41365	50083	36622	33222	33999	24262	16930	27782	33944	63058	146369
Isophthalic acid_ 2TMS derivative	929.484	482	XIC(295.08¡À500ppm)	Infinity	2904244	1791659	1299722	1024603	924135	783064	719331	634853	127703	570293	1009970	735971	641195	555435	534492	466582	430150	407470	392348	410841	1543590
terephthalic acid	960.695	754	XIC(295.08¡À500ppm)	Infinity	29819685	19352079	15011240	12236335	10735388	10205702	9016450	8141415	7600521	7072174	12954776	9477120	8409801	7479980	7280908	6060454	6105198	5838114	5504873	5723961	20015039
4-Hydroxybenzyl alcohol_ 2TBDMS derivative	1814.82	425	XIC(295.08¡À500ppm)	Infinity	550423	271666	316574	321368	353780	363628	371225	366849	377967	415950	503541	567242	581411	634887	710004	702468	715508	720910	704404	765197	362473
2_4-Pyridinedicarboxylic acid_ 2TMS derivative	971.318	293	XIC(296.07¡À500ppm)	Infinity	5026388	1308556	3158480	638855	2320323	2010491	554379	394585	382226	1423435	577926	1296496	1223268	262216	251674	863989	184437	727570	746929	690237	1671979
ribulose-5-phosphate 2	1295.01	338	XIC(297.11¡À500ppm)	Infinity	230063	277819	443835	182806	934364	190332	232945	591117	316561	218938	215889	245218	261685	273361	857748	259814	252919	198896	637383	249297	217729
phosphate	455.633	778	XIC(299.07¡À500ppm)	Infinity	3163819430	2551722788	2475271094	2076570057	2071611553	1684953524	1535240083	1524030934	1282776081	1203548872	1872054260	1357089496	1303783422	1179918890	1328944482	1122538856	937007064	935228474	974370809	824414635	1828278747
O-Phosphorylethanolamine	950.555	453	XIC(299.07¡À500ppm)	Infinity	354616	408059	711641	308701	1077430	252234	188654	679698	167420	181930	338459	187233	271837	190234	927968	304069	289204	308250	1037611	206024	336569
beta-Glycerophosphoric acid:2	890.504	550	XIC(299.08¡À500ppm)	Infinity	1991773	1561770	1210356	1058717	976762	886927	808780	726258	657976	664243	1051349	829610	778899	659248	653077	623904	560758	533834	531544	533754	1129407
D-(glycerol 1-phosphate)	928.654	722	XIC(299.08¡À500ppm)	Infinity	8487722	4931301	6362297	4930517	5743736	3437619	3362740	4084676	2227882	2470879	5187721	3096125	3352316	2918034	4407597	4257987	3051514	2765386	3371357	2551287	5023319
3-phosphoglycerate	975.252	565	XIC(299.08¡À500ppm)	Infinity	737688	189679	737324	683035	910524	554014	45210	637117	281345	309716	871038	557148	447845	471755	884254	870513	664539	671861	703945	440137	528845
pentadecanoic acid	1090.29	597	XIC(299.24¡À500ppm)	Infinity	433021	493496	978544	911848	1328462	912383	524013	819443	479910	406848	562389	433155	473326	451401	1777269	1202309	905710	901122	1125042	1642504	549229
pentadecanoic acid:2	1128.95	480	XIC(299.24¡À500ppm)	Infinity	1498662	973436	1032553	677074	809403	598703	576793	655568	498787	451709	763224	608617	486711	467990	635122	483528	417328	468015	537904	600627	1524997
Suberic acid_ 2TMS derivative	865.713	472	XIC(303.14¡À500ppm)	Infinity	4906521	2428588	1528669	1159876	953062	805947	713525	605960	543663	486066	2324875	1370795	1048304	780485	711393	575379	517091	494968	429707	412668	5864453
Methylsuccinic acid_ 2TBDMS derivative	1135.75	296	XIC(303.18¡À500ppm)	Infinity	331510	250286	160131	124784	110055	102255	94260	88774	79138	72818	197583	134648	120009	104558	114837	80100	86505	75950	65590	77464	310096
Tagatose 1	1045.48	535	XIC(307.00¡À500ppm)	Infinity	208611	129101	117996	145973	107008	87297	93886	81940	61144	74578	88791	81964	721059	102046	102482	84417		103625	83886	105223	221253
Tagatose 2	1055.74	518	XIC(307.00¡À500ppm)	Infinity	105504	87879	71127	80465	67439	60199	51577	56021	61144	49877	64044	54082	472575	66605	82087	77232	78172	64007	53701	72705	155708
d-Xylose_ 2_3_4_5-tetrakis-O-(trimethylsilyl)-_ O-methyloxime	1045.48	535	XIC(307.15¡À500ppm)	Infinity	484534	322651	283708	333271	284843	199653	174638	221816	145326	191847	161456	152579	1619164	199564	229827	183540		230470	194853	218367	447155
palmitoleic acid:2	1204.63	551	XIC(311.24¡À500ppm)	Infinity	1018646	605655	496582	420290	369569	348746	323833	348983	285052	268300	395034	301388	282308	255732	266007	237986	222825	240969	249334	205380	838152
palmitoleic acid	1210.94	701	XIC(311.24¡À500ppm)	Infinity	10314082	5304063	4126759	3317892	3124805	2701439	2474022	2443337	2125507	2032625	3028601	2252143	1950773	1792640	1955358	1776879	1577378	1561295	1658463	1593931	7398789
palmitic acid	1234.51	723	XIC(313.25¡À500ppm)	Infinity	856660871	404380297	350140300	177573879	205773186	171443393	189785393	163663621	133662548	138983414	242798719	201957101	126523796	120514723	131726432	101626005	83101895	100319107	123891522	170951124	819101396
Phosphorylethanolamine_ 4TMS derivative	950.555	453	XIC(315.10¡À500ppm)	Infinity	75818	81081	117280	62122	189368	59315	36414	132664	31482	31718	58076	31322	48941	32668	173392	52025	51264	57577	190773	45062	54909
cytidine-monophosphate 1	1203.03	701	XIC(315.11¡À500ppm)	Infinity	228170	179077	255663	332597	335257	266454	190505	257858	194407	215480	390579	243290	275104	305545	337693	499931	412669	362663	358000	276756	208128
azelaic acid	967.97	679	XIC(317.16¡À500ppm)	Infinity	33889119	15352651	9636423	7081525	5620687	4500880	3901485	3314978	2898041	2618870	10380556	5909387	4391637	3472143	3025993	2450160	2159892	1993757	1852731	1696102	28554405
lysine	1100.47	646	XIC(317.23¡À500ppm)	Infinity	3566693	2874837	4699991	3426728	4665549	2866145	2388710	3414694	1966678	2534118	4532309	2702857	3343688	3197460	4801616	4163599	4236273	3425006	3873877	2899919	3300678
1-Monopalmitin	1668.19	741	XIC(317.29¡À500ppm)	Infinity	219342	199466	180569	167531	56653	155081	64407	67204	57821	152911	57214	59054	64405	149103	152747	50364	152181	66782	61198	49792	177347
myo-inositol	1276.88	434	XIC(319.13¡À500ppm)	Infinity	90913	66825	108446	72091	78202	74536	55981	58970	53537	64689	103387	75147	70393	86150	108376	89963	91270	75830	75254	88198	103047
Heptadecanoic acid_ TMS derivative:2	1307.41	474	XIC(327.27¡À500ppm)	Infinity	449914	284157	283167	15981	179711	156101	165114	156255	137666	124354	199116	171724	113856	123335	163335	157533	116508	132424	136616	234188	476843
Heptadecanoic acid_ TMS derivative	1336.37	446	XIC(327.27¡À500ppm)	Infinity	4843357	2447023	109336	82129	74471	1139797	64139	42448	39874	52401	1530812	1265004	41250	44643	29660	39695	33907	30855	719383	55122	4663233
Octadecanol	1349.81	546	XIC(327.31¡À500ppm)	Infinity	7086356	6638287	6223055	5864611	4566262	5842956	4836127	4319542	4697538	5307613	5363182	4995569	5269982	6094307	5795109	4967947	5893976	4748636	4547751	4819219	7367931
Sebacic acid_ 2TMS derivative	1070.91	479	XIC(331.17¡À500ppm)	Infinity	3374405	1646072	1129024	849998	718322	601860	559911	485418	441920	416277	1172205	738197	634103	517559	489275	403723	381308	378362	369899	388351	2729415
9(E)_11(E)-Conjugated linoleic acid_ trimethylsilyl ester	1497.92	672	XIC(337.25¡À500ppm)	Infinity	4747498	1640710	1168920	916220	846210	707743	715792	641752	599112	568744	1013325	676512	609795	554231	521695	468638	436692	447961	429453	405015	4061653
Elaidic acid	1427.15	432	XIC(339.26¡À500ppm)	Infinity	671874	248199	214816	156699	150670	146025	124082	132013	197029	265463	173811	128753	232741	123170	117844	108886	151259	160303	105589	108086	495887
bis-(4_6-Di-azido-1_3_5-triazin-2-yl)-amine	1492.89	78	XIC(339.28¡À500ppm)	Infinity	305735	171545	970098	111257	95666	49867	82456	45450	35300	69029	112609	52911	40997	27785	69953	67912	33663	32816	37484	33607	260356
stearic acid	1438.37	690	XIC(341.28¡À500ppm)	Infinity	964960230	351439802	300779766	128947110	160760872	128171904	156038541	115483480	101575134	109540890	205365249	165514505	90478212	87406934	93222549	72382766	56529797	70793043	86449292	141325150	926457218
1_2_4-Benzenetriol	767.689	679	XIC(342.14¡À500ppm)	Infinity	7063501	6026736	4831975	4291434	3766070	3451139	3303951	2934144	2832696	2652766	4720020	3795209	3413620	3027135	2861477	2492682	2337389	2214071	2156356	2108856	5373172
2-Pentenedioic acid_ 2-[(trimethylsilyl)oxy]-_ bis(trimethylsilyl) ester	773.6	423	XIC(347.11¡À500ppm)	Infinity	1344930	815535	550310	451003	384668	309168	285377	242697	221871	205945	455563	314185	247042	220596	196539	170857	152495	144340	139939	127530	736853
Oleic Acid_ (Z)-_ TMS derivative	1410.57	745	XIC(354.29¡À500ppm)	Infinity	72621258	26132075	17845416	13641577	11566752	9814412	9212435	8284556	7494759	7059241	12076362	8137191	6747179	5987915	5543501	4784947	4503792	4340438	4159671	3965063	46929207
Heptasiloxane_ hexadecamethyl-	1759.21	411	XIC(355.08¡À500ppm)	Infinity	134949	117118	158918	207296	121735	131090	189074	173538	180102	147746	207363	333174	179314	231522	255409	222609	242317	274496	215429	267913	122922
Phosphoglycolic acid	760.567	545	XIC(357.08¡À500ppm)	Infinity	2617752	3479386	2682399	2158898	1824532	1546855	1422059	1173934	1063053	937959	1004432	842262	829864	709726	687472	460447	390912	403048	390033	360973	636435
D-(glycerol 1-phosphate):2	928.654	722	XIC(357.12¡À500ppm)	Infinity	7164253	4283303	5563554	4178366	4890724	2881891	2900101	3453535	1924871	2195192	4192413	2507970	2699058	2386879	3622841	3470820	2459879	2245187	2789089	2054266	4144267
carbamoyl-aspartic acid 2	1590.7	322	XIC(359.17¡À500ppm)	Infinity	687843	472461	464689	407916	272360	399062	257144	240497	236173	333604	329518	290790	276453	378712	350995	250288	341122	231444	238511	242012	842322
cis-gondoic acid:3	1580.39	444	XIC(365.25¡À500ppm)	Infinity	1026123	340047	31460	194757	11345	139756	146802	125946	21098	116455	190313	25502	27335	107135	20983	22157	16290	79903	1249	18057	639478
cis-gondoic acid:2	1580.39	444	XIC(365.25¡À500ppm)	Infinity	1026123	340047	31460	194757	11345	139756	146802	125946	21098	116455	190313	25502	27335	107135	20983	22157	16290	79903	1249	18057	639478
cis-gondoic acid	1587.93	326	XIC(367.30¡À500ppm)	Infinity	1416187	1940825	399529	325378	974907	790100	245044	207976	172255	587530	1132173	218220	193737	595917	552991	493481	458595	140832	430973	121145	1223618
Arachidic acid	1599.27	698	XIC(369.31¡À500ppm)	Infinity	5702838	1816649	1406022	909920	931298	793177	831737	700040	628221	648886	1514167	995866	729926	673569	653559	552740	513003	539962	584182	703129	7655079
1-Monopalmitin:2	1668.19	741	XIC(371.29¡À500ppm)	Infinity	43765840	37874874	37089873	33784950	9295458	32580968	8717379	8305527	8488856	28510023	9751185	8701673	8926096	31728515	31930978	8431349	31613983	7961709	7883160	8003008	41712034
Tricarballylic acid_ 3TMS derivative	899.482	477	XIC(377.13¡À500ppm)	Infinity	3236345	2487366	1683329	1407509	1207935	1028032	932076	799722	716199	676258	825554	664514	590951	511892	490371	376224	339420	358922	336247	333774	948624
13_16-Docasadienoic acid_ (Z)-_ TMS derivative	1677.73	330	XIC(393.31¡À500ppm)	Infinity	7038	41127	9939	30422	24657	12881	25094	29088	12936	27063	4869	7440	6366	6129	13022	18802	12856	23084	9931	14461	252415
13-Docosenoic acid_ (Z)-_ TMS derivative:2	1679.43	552	XIC(395.32¡À500ppm)	Infinity	404151	142452	97548	85896	83198	106626	95920	87456	81189	91183	265743	111220	80153	101476	104767	94460	98670	79578	88864	63783	1642325
13-Docosenoic acid_ (Z)-_ TMS derivative:2	1679.43	552	XIC(395.32¡À500ppm)	Infinity	404151	142452	97548	85896	83198	106626	95920	87456	81189	91183	265743	111220	80153	101476	104767	94460	98670	79578	88864	80447	1642325
1-Monooleoylglycerol_ 2TMS derivative	1732.45	531	XIC(397.30¡À500ppm)	Infinity	2036244	1376811	1125202	954134	817009	721821	699298	658707	600253	576431	798249	649402	575701	551533	511102	468824	464804	407348	396711	398681	1122106
Behenic acid	1688.81	681	XIC(397.34¡À500ppm)	Infinity	2370973	763570	559593	448226	409626	365083	370502	318522	306641	302393	774428	425471	324044	311080	298960	251893	255415	251692	265949	256931	4282156
Monostearin	1741.8	730	XIC(399.32¡À500ppm)	Infinity	20423386	17662445	17245496	15837044	4781789	15306142	4400684	4208303	4246518	13321886	4914236	4400359	4440537	14749750	14737666	4295768	15142181	3983618	4004322	4020027	18752820
Formamide_ N-(1-cyanoethenyl)	244.122	234	XIC(41.00¡À500ppm)	Infinity	6600028	6513080	6984233	6252742	6380717	5963885	6394139	7461087	6161003	6302169	7885325	6898127	6919761	8014030	6551072	7327073	8453852	9395785	9026810	8975302	8469161
3-Methyl-3-buten-1-ol_ pentafluoropropionate	216.516	259	XIC(41.01¡À500ppm)	Infinity	21359065	19611915	6858607	19584127	19979515	20256029	19756124	21052271	19265606	20274809	18621330	15985186	20522243	1596729	2237605	19251812	6950799	20059947	20898277	20287635	19365493
3-Chloro-5-(2-methylpropyl)-1H-1_2_4-triazole	220.231	410	XIC(41.01¡À500ppm)	Infinity	52864640	46667992	45837744	47627916	44128016	49486841	49790097	44762688	49262611	43508647	45844886	47634429	46991098	46751055	57877148	47584357	47787115	45446181	50440385	49824613	50862005
Trimethylsilyl tricosanoate	1726.39	534	XIC(411.36¡À500ppm)	Infinity	846123	282939	191850	170797	154868	154113	147656	118321	110429	106721	402846	183936	130638	130817	114013	88406	107712	91713	96098	83775	2031739
15-Tetracosenoic acid_ (Z)-_ TMS derivative	1756.69	528	XIC(423.36¡À500ppm)	Infinity	1926371	628464	339007	324668	302440	280538	208885	206379	210191	181374	567277	245977	179249	194058	187258	137913	144582	148600	152665	159421	2271568
Lignoceric acid	1766	689	XIC(425.37¡À500ppm)	Infinity	2597837	842820	553895	467775	394564	368144	330836	312827	296151	311756	705412	394599	322542	255136	245086	253603	218056	203813	212742	221209	2793478
2_2'-Methylenebis(6-tert-butyl-4 methylphenol)_ O_O'-bis(trimethylsilyl)-	1626.17	528	XIC(427.24¡À500ppm)	Infinity	10337058	8673782	8489078	7668391	5461259	7335216	5092363	4839672	4953370	6417299	6058361	5469290	5552039	7512683	7515773	5440096	7290360	5076332	5023013	5225171	10233105
Silane_ dimethylnonyloxyhexadecyloxy-	1825.6	257	XIC(427.35¡À500ppm)	Infinity	159653	100848	111346	111987	57059	85571	37552	36767	36882	74716	31978	42009	36777	79313	98067	33158	79474	30434	31408	31168	108032
2-Propenoic acid_ anhydride	216.782	184	XIC(55.02¡À500ppm)	Infinity	6379901	6102328	8379196	5448613	6195678	7441271	6918589	6112028	7086101	6707501	6596001	7348261	10011977	7785651	13327609	8001585	7588518	8041418	8545486	8271977	8600024
Diacetyl monoxime_ TBDMS derivative	247.867	402	XIC(56.03¡À500ppm)	Infinity	10083199	11311776	10148754	14549314	10692746	14250962	10759075	10925511	10554385	14545855	16739160	15822012	15250790	15336497	15043033	16300897	17095150	18400849	17277485	16817989	15895341
tetracosane	1396.46	569	XIC(57.05¡À500ppm)	Infinity	10333827	5785380	5719211	855701	2418298	1648258	3462833	1782241	1555864	2276913	2996871	4034450	904921	1328329	1729678	1216596	558374	1194510	1749106	4837788	12108157
Octadecane_ 2-methyl-	1961.97	560	XIC(57.05¡À500ppm)	Infinity	4875656	2388411	2295111	407055	1284952	788715	1321500	806205	733595	1003724	1161681	1968250	394613	466125	632340	600412	342805	557095	785477	2322602	4435930
Ethylamine_ 2-((p-bromo-¦Á-methyl-¦Á-phenylbenzyl)oxy)-N_N-dimethyl-	222.546	224	XIC(58.04¡À500ppm)	Infinity	37271656	34359204	30573330	31827946	32831864	35738886	33231366	29617552	27468635	26426611	43376579	42987240	35878236	34784703	34436429	40933661	46043704	42509428	44474860	43401897	52396597
1_3-Dioxolane-4_5-dimethanamine_ N_N_N'_N'_2_2-hexamethyl-	251.941	269	XIC(58.04¡À500ppm)	Infinity	13431267	10618363	10308753	5710523	10363572	9600135	10564411	10345894	10818418	8750772	12224261	12286166	12140303	10320364	10201415	11136152	10501366	12059884	11596948	12050317	15336805
Octyl S-2-(dimethylamino)ethyl propylphosphonothiolate	641.101	295	XIC(71.06¡À500ppm)	Infinity	20045976	17028762	13600265	11963759	10740134	9742963	9427743	7972674	7717960	7495486	11402027	9169761	8328298	7606431	7004244	5568181	5336124	4656678	4679535	4171898	13206399
Boric acid_ 3TMS derivative	218.86	459	XIC(73.03¡À500ppm)	Infinity	395925616	375713746	378154429	339594185	344020675	363623221	355590033	388494502	350254612	374822042	513345848	458001318	420063881	462307765	519283996	430971817	458394777	421876531	537506080	486298396	488660473
Methoxyamine_ TMS derivative	239.572	274	XIC(73.03¡À500ppm)	Infinity	15781494	18304132	17236971	17824141	18793316	18563752	18517466	18504636	20173713	19109666	24293758	24778315	21077289	20671667	20751208	27439933	26922345	28007845	24608644	27166442	20972424
Methoxyamine_ TMS derivative	239.572	274	XIC(73.03¡À500ppm)	Infinity	15781494	18304132	17236971	17824141	18793316	18563752	18517466	18504636	20173713	19109666	24293758	24778315	21077289	20671667	20751208	27439933	26922345	28007845	24608644	27166442	20972424
Tris(trimethylsilyl)carbamate	245.629	473	XIC(73.03¡À500ppm)	Infinity	336451252	327403966	340152075	304434209	354676875	314685730	360801318	339370858	359153818	287871225	468276429	454780157	466327961	396031659	379324561	441537286	390361440	457435277	463592927	479564180	420158694
oxalic acid	326.522	608	XIC(73.03¡À500ppm)	Infinity	88565733	95275868	86900593	79711841	100417608	93619515	73543603	77848921	68210288	60692369	96840636	84745784	88667150	74485963	72243562	63547524	77629782	68605842	61795787	58356015	86746577
1-(Trimethylsilyl)-3-[(trimethylsilyl)oxy]urea:2	336.407	560	XIC(73.03¡À500ppm)	Infinity	2200818140	2359130170	2305580962	2404262172	2206715079	2401644371	2593364149	2150923977	2972813429	2438789838	2963873758	3037009472	3339334556	2997659951	2586371845	3121556338	2897886812	3119309015	2737851655	3046251385	2618471819
1-cis-Vaccenoylglycerol	1650.98	428	XIC(73.03¡À500ppm)	Infinity	1718186	1854112	1750885	1482569	1963733	1317913	1548221	1084016	998016	658818	855116	989810	997121	1326689	1096649	1044828	910633	1011724	943620	1157049	1531755
Formamide_ N-methylthio	1335.43	250	XIC(75.01¡À500ppm)	Infinity	83763455	85913084	73643629	60751260	57048895	52531854	50720902	42537936	40421084	36995044	45753238	40619745	36687787	32671793	32709934	19810928	20165372	21370306	17111518	23655233	38689304
uridine 2	1377.23	503	XIC(75.01¡À500ppm)	Infinity	11860073	5284585	3435204	2279454	2588814	1736081	1821434	1302564	1151904	1080603	4541086	3002207	2065660	1681492	1623972	1630398	1422225	1343665	1071420	952520	13894654
linoleic acid	1452.92	562	XIC(75.01¡À500ppm)	Infinity	22665569	9813504	865793	4473735	2127868	4026910	1944733	4051195	1328000	3748233	5880159	4684307	3255791	1496971	3316910	2509371	1899675	1473479	2408041	3900819	5717704
linoleic acid:2	1497.92	672	XIC(75.01¡À500ppm)	Infinity	19929830	7725960	6003071	4985473	4332559	4304124	4080549	3920272	3569055	3701536	6209566	4829398	4296479	4141055	3419780	3446197	3939807	3239892	3143936	3012998	19236348
3-Phenylpyrrolidine	250.123	368	XIC(78.02¡À500ppm)	Infinity	1928418	2043766	2112930	1821586	2411085	2040812	1650441	2648403	1791620	2189538	2380882	2127980	1484087	2286427	2518893	2688305	3409803	3021006	2797520	2904193	2913855
Octanoic acid_ 3-hexenyl ester_ (Z)-	1713.97	63	XIC(82.06¡À500ppm)	Infinity	1047763	655407	642868	358172	415138	488390	471638	389244	474979	483350	426604	477943	354240	390138	384323	411941	328879	286311	520337	483726	1335228
Cyclohexane_ hexyl-	1850.32	333	XIC(82.06¡À500ppm)	Infinity	1153939	576841	615029	131735	280856	229229	350372	256275	178046	233275	357767	478519	161321	138001	227229	162303	81811	148718	225725	528883	1440379
Cyclohexanecarboxylic acid_ 3-phenylprop-2-enyl ester	220.53	312	XIC(83.05¡À500ppm)	Infinity	17792833	17705985	16700851	17611000	17349522	16949783	17316817	17389481	16853345	17540197	20935057	21009939	19644132	20077336	21035820	19606121	21116789	22112067	22879254	22159198	20754111
Phosphorous acid_ dibutyl ester	403.404	283	XIC(83.05¡À500ppm)	Infinity	4354938	4519332	4495358	4605441	4499193	4424817	4310097	4412056	4390564	4359789	5397656	4900288	5010520	4885294	4979049	5101773	5260187	5497614	5598538	5271420	4863303
5-Methyl-2-(2-methyl-2-tetrahydrofuryl)tetrahydrofuran	1694.01	324	XIC(85.09¡À500ppm)	Infinity	829645	413049	377539	843792	223150	987300	626465	550349	576873	511358	887158	336885	583301	962523	296394	612057	802849	616350	286773	449192	1010341
Octane_ 3_4_5_6-tetramethyl-	1772.68	221	XIC(85.09¡À500ppm)	Infinity	687603	296182	234979	37337	113569	620311	130930	83223	80748	99743	123636	241532	41819	48300	81065	64225	25574	68234	100795	148314	746547
Octanamide	1744.72	162	XIC(86.05¡À500ppm)	Infinity	625558	398264	565763	461469	519157	426855	164497	209699	88141	224532	318335	263053	428806	301012	549648	290156	691159	425801	472849	217802	391483
(S)-4-Ethyl-2-oxazolidone	252.251	450	XIC(86.06¡À500ppm)	Infinity	6695770	6008900	5686022	2969140	5698018	5555864	6243006	5652191	6266582	5403936	7529262	7102568	7514724	6023951	6128254	7026979	6597908	7219460	7344362	7646916	8573995
Acetamide_ N-ethyl-	216.881	241	XIC(87.00¡À500ppm)	Infinity	5657382	5431773	5531844	5364576	5292281	5338193	4888601	5085912	4952540	5126371	9879725	10015084	10507602	8683682	11399998	9250644	9167071	9843519	9514498	9735048	10516073
methyl octadecanoate	1318.66	326	XIC(87.04¡À500ppm)	Infinity	1290579	814162	813710	175610	474868	272661	466208	394388	325542	330246	551362	551118	202525	189592	418046	322862	197439	228636	546969	590242	1452379
Sulfurous acid_ di(cyclohexylmethyl) ester	566.072	359	XIC(97.09¡À500ppm)	Infinity	357917	282922	168313	134368	129932	111938	200427	128880	154398	188732	271096	252248	148278	159613	123181	171505	147254	160287	133208	297757	492763
1-Decanol_ 2_2-dimethyl-	396.021	364	XIC(155.10¡À500ppm)	Infinity	442034	18607	38174	4710	11954	14108	16897	16407	9546	20035	5028	28970	40879	7501	7866	21199	171	0	8679	11187	3369122
7-Oxooctanoic acid_ TMS derivative	1662.16	219	XIC(173.11¡À500ppm)	Infinity	292075	122435	62537	0	74409	55477	39265	43520	39668	36288	152737	50778	46564	26198	48506	27505	29473	38900	25417	38059	242699
beta-Alanine 2	605.958	585	XIC(248.13¡À500ppm)	Infinity	473436	0	528670	468973	502562	358294	176022	346750	146657	212002	367981	191202	178572	196867	226195	190469	171663	162768	168571	124123	510806
13-Docosenoic acid_ (Z)-_ TMS derivative	1681.76	348	XIC(395.33¡À500ppm)	Infinity	411561	153637	99880	47661	84637	21729	15326	29498	0	13784	269498	113048	81757	77027	97589	61393	60586	83549	81328	80447	240283
9_12-Octadecadienoic acid (Z_Z)-_ TMS derivative	1462.56	524	XIC(75.01¡À500ppm)	Infinity	3293000	1468452	644823	636391	3008800	2060987	466664	343585	591573	0	1081602	597883	835292	634935	703476	792439	798147	1062875	758845	991173	14204311
2-Thiopheneacetic acid_ 4-tetradecyl ester	1770.36	348	XIC(97.09¡À500ppm)	Infinity	771687	799560	340123	354324	483818	354322	306374	732613	285042	338921	606614	397467	327846	288938	253273	153035	282028	0	228039	448349	1101578
2-(1-Methylcyclohexyloxy)-tetrahydropyran	1868.48	296	XIC(97.09¡À500ppm)	Infinity	0	311182	313318	73844	178543	86335	201524	131780	119902	135964	196561	241773	98650	172588	121919	116295	95719	115161	124481	259571	795888
Cyclopentane_ 1-hydroxymethyl-1_3-dimethyl-	1816.12	334	XIC(97.10¡À500ppm)	Infinity	1553196	450668	0	209218	45078	372042	442061	159368	184707	226582	100319	402116	89472	138887	175288	172591	108544	123750	178920	499212	1159699
Cyclohexanone_ 2_2-dimethyl-	1767.77	251	XIC(126.12¡À500ppm)	Infinity	53103	123885	73781	3625	89051	30769	46034	106121	46039	59265	61338	65482	2508	130915	0	0	56836	0	0	58564	144245
Nonane_ 2_3-dimethyl-	1812.39	250	XIC(112.12¡À500ppm)	Infinity	412535	37803	0	0	172883	185380	51426	0	37739	58399	0	0	0	0	0	0	0	0	24204	54827	490924
Sulfurous acid_ 2-ethylhexyl isohexyl ester	1808.49	382	XIC(113.10¡À500ppm)	Infinity	846863	131074	0	0	0	0	70982	0	26517	27622	0	0	120877	0	0	0	0	112034	141464	107723	130523
[3-(4-Methoxyphenyl)-4_5-dihydro-1_2-oxazol-5-yl]methanol	1679.82	256	XIC(207.04¡À500ppm)	Infinity	0	0	0	467291	566927	0	168501	428722	0	0	0	0	0	0	0	576518	0	0	520982	450150	656133
Undecane_ 3_5-dimethyl-	1829.18	132	XIC(99.11¡À500ppm)	Infinity	146415	0	0	0	119662	37567	0	0	72928	143780	0	0	0	0	0	0	0	69514	0	0	187182
