# Supplementary material for: Silver nanoflowers coupled with low dose antibiotics enable the highly effective eradication of drug-resistant bacteria
Source: Royal Society of Chemistry journal article supplement (doi:10.1039/d1tb01773j), 2021-01-01
Supplement: d1tb01773j2.pdf [file d1tb01773j2.pdf]

## Supporting Information

1  
2  
3  
4  
5  
6  
7  
8  
9  
10  
11  
12  
13  
14  
15  
16  
17  
18  
19  
20  
21

### **Silver Nanoflower Coupled With Low Dose Antibiotics Enables Highly Effective Drug-resistant Bacteria Eradication**

Xin Li,<sup>a</sup> Khan Zara Ahmad,<sup>a</sup> Jie He,<sup>a</sup> Hongxia Li,<sup>a</sup> Xin Wang,<sup>a</sup> Zijian Feng,<sup>a</sup> Xiansong Wang,<sup>b\*</sup> Guangxia Shen,<sup>a\*</sup> Xianting Ding<sup>a\*</sup>

a. Institute for Personalized Medicine, State Key Laboratory of Oncogenes and Related Genes, School of Biomedical Engineering, Shanghai Jiao Tong University, Shanghai, 200030, China.

b. Department of Thoracic surgery, Shanghai Key Laboratory of Tissue Engineering, Shanghai Ninth People's Hospital, Shanghai Jiao Tong University School of Medicine, Shanghai 200011, China.

Corresponding Authors: [wonderluis@126.com](mailto:wonderluis@126.com); [gxshen@sjtu.edu.cn](mailto:gxshen@sjtu.edu.cn); [dingxianting@sjtu.edu.cn](mailto:dingxianting@sjtu.edu.cn)

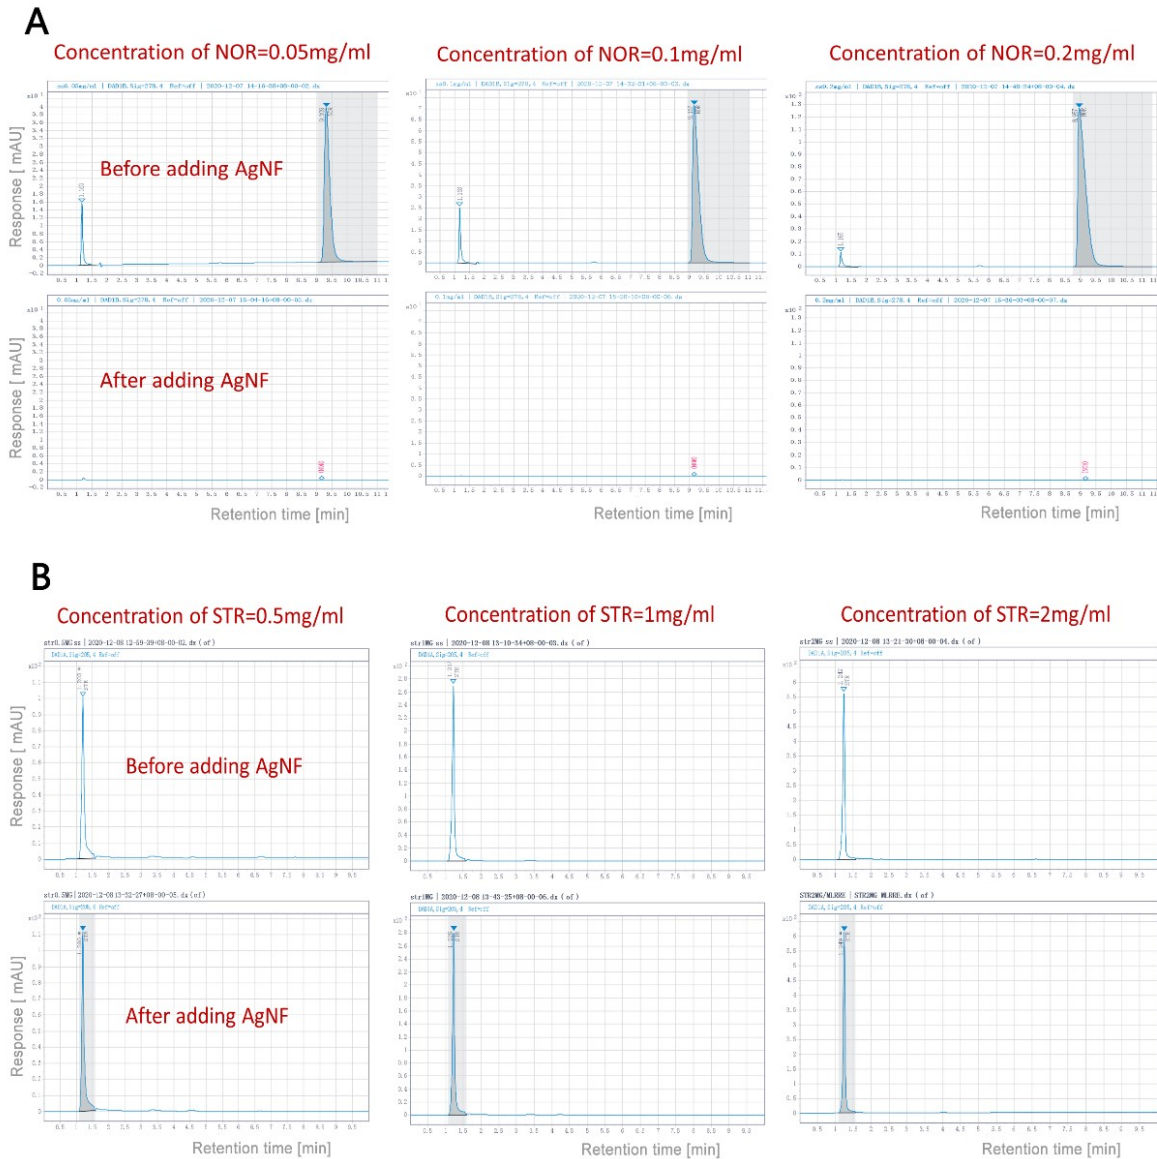

22

23

24 **Fig S1 The HPLC data of two antibiotics interacted with AgNFs.**

25 (A) The peak area of NOR before and after adding AgNFs. (B) The peak area of STR before

26 and after adding AgNFs.

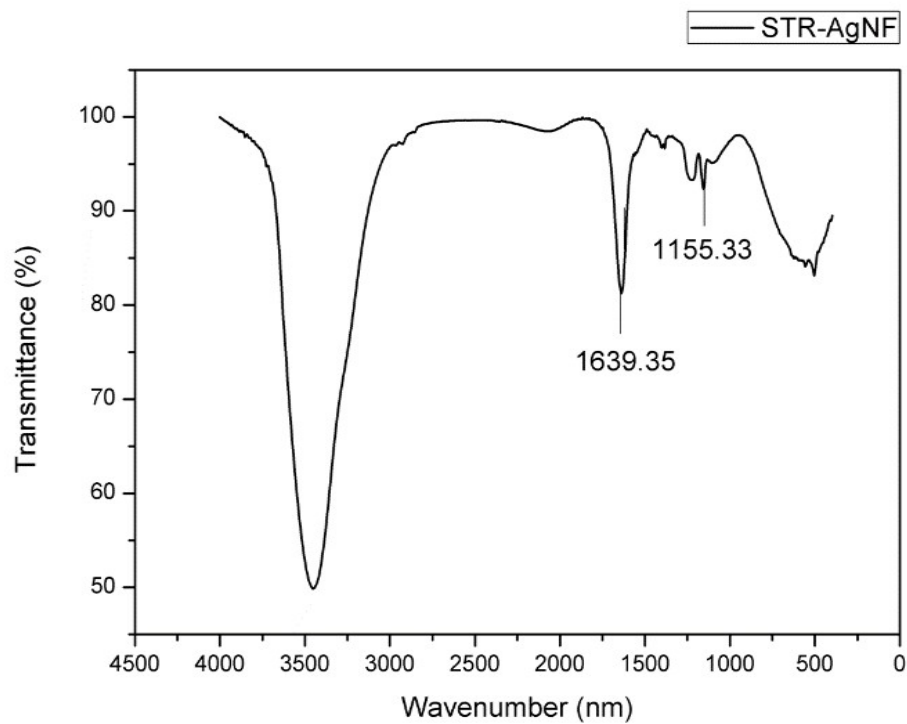

27  
28 **Fig S2 FTIR of STR-AgNFs**  
29  
30  
31

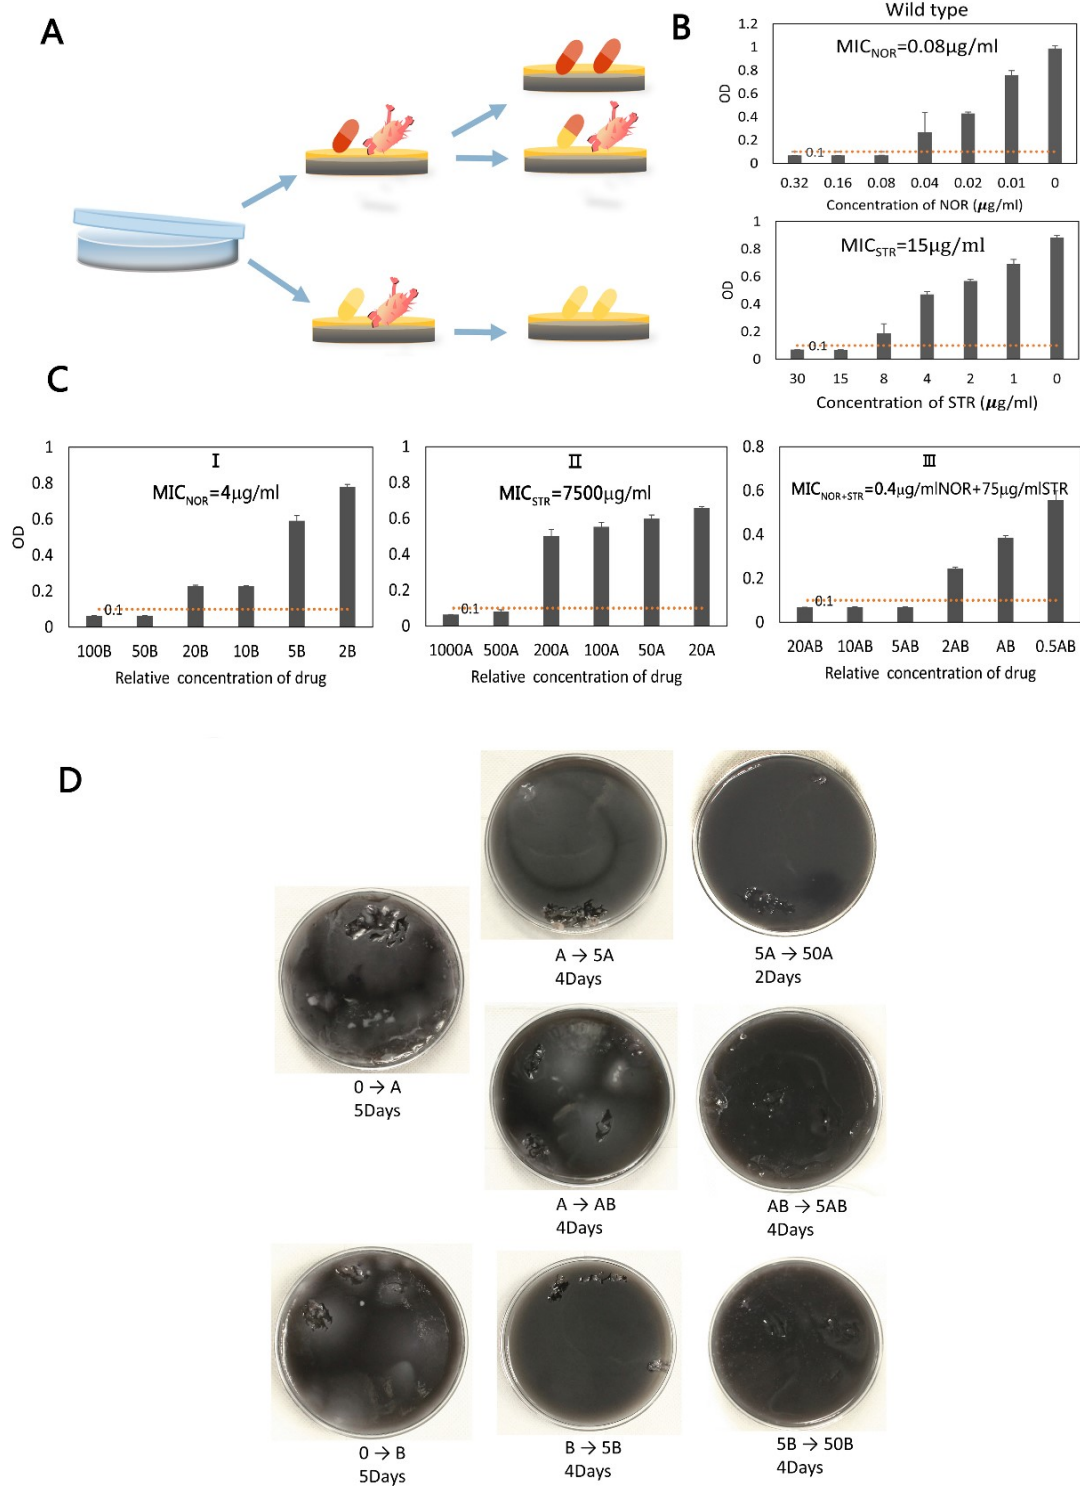

32

33 **Fig S3 The process of resistant bacteria induction and MIC of wild type *E. coli***

34 (A) The schematic of resistance induction through concentration gradient via agar plates

35 (planktonic steps are not shown). (B) The MIC of NOR and STR against wild type *E. coli*. A

36 refers to STR and B refers to NOR. (C) The MIC of antibiotics against resistant *E. coli*. (D)

37 Pictures show the grown bacteria on the agar plate during the induction.

38

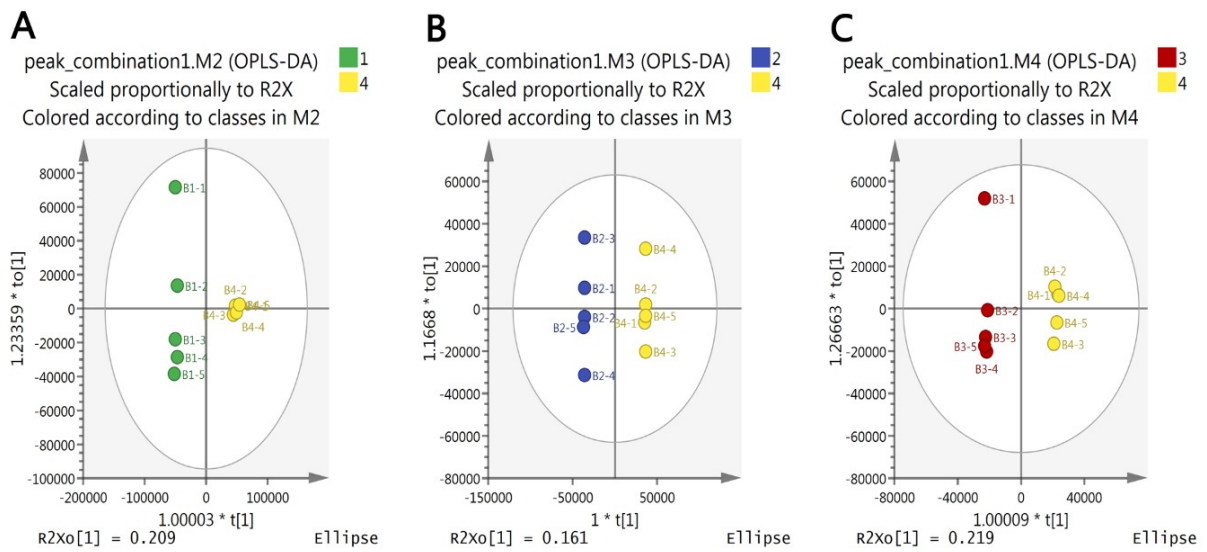

39  
 40  
 41  
 42  
 43  
 44  
 45  
 46  
 47  
 48  
 49  
 50  
 51  
 52  
 53  
 54  
 55  
 56  
 57  
 58  
 59  
 60  
 61  
 62  
 63  
 64  
 65  
 66  
 67  
 68  
 69

**Fig S4 OPLS-DA of three pairs of sample groups**

(A) OPLS-DA of 1vs4 (B) OPLS-DA of 2vs4 (C) OPLS-DA of 3vs4. All of them show total differentiation between experimental and control groups.

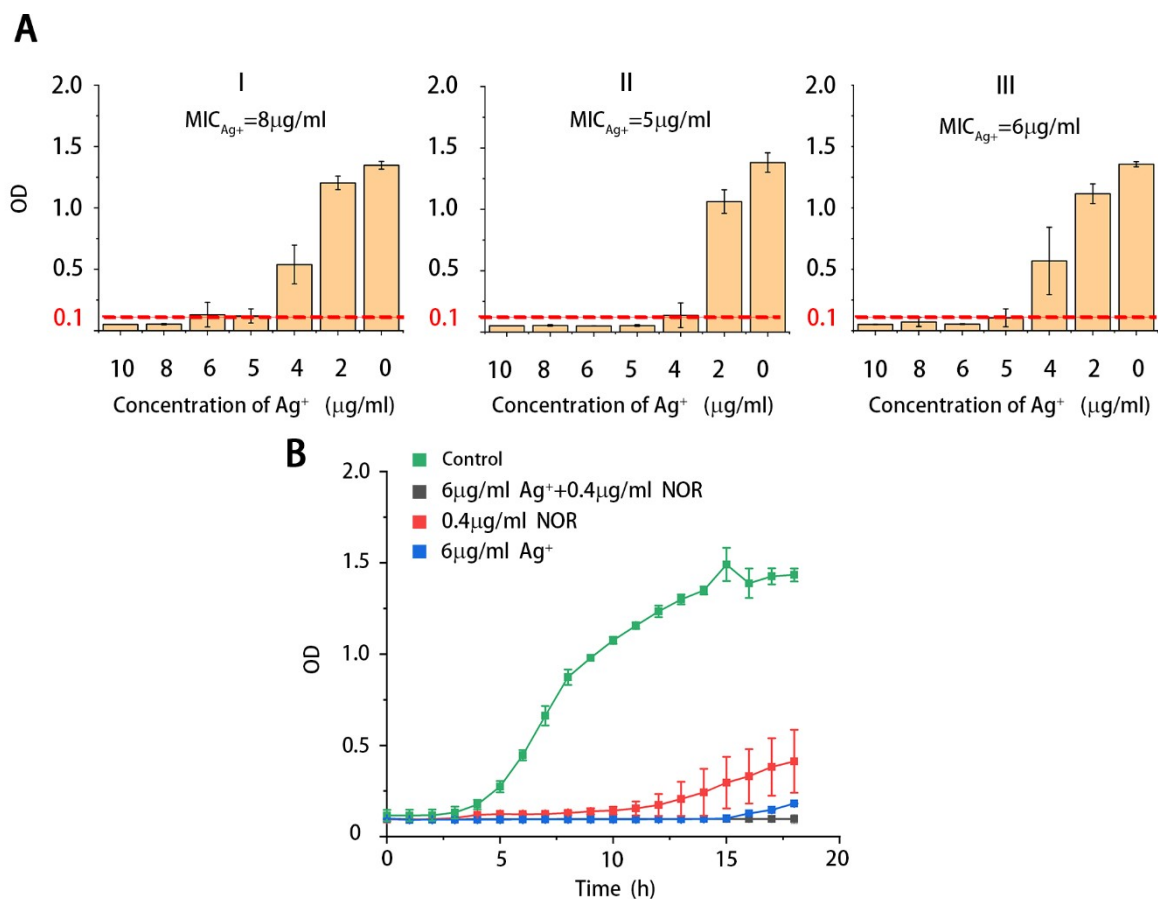

70

71 **Fig S5 The MIC of Ag<sup>+</sup> towards Strain I, II, III and the growth curve of strain I treated by**  
 72 **different mbined treatment of Ag<sup>+</sup> and NOR.**

73 (A) The MIC of Ag<sup>+</sup> towards Strain I, II, III; (B) Comparing with the inhibitory concentration of  
 74 Ag ions applied individually (8 µg mL<sup>-1</sup>), the concentration of Ag<sup>+</sup> required in combined  
 75 treatment is 6 µg mL<sup>-1</sup>.
